# Supplementary material for: Machine learning assisted identification of the matched energy level of materials for high open circuit voltage in binary organic solar cells
Source: Royal Society of Chemistry journal article supplement (doi:10.1039/d2me00265e), 2023-01-01
Supplement: d2me00265e1.pdf [file d2me00265e1.pdf]

## Supporting Information

### Machine Learning Assisted Identifying the Matched Energy Level of Material for High Open Circuit Voltage in Binary Organic Solar Cells

Kuo Wang<sup>a</sup>, Chaorong Guo<sup>a</sup>, Zhennan Li<sup>a</sup>, Rui Zhang<sup>a</sup>, Zhimin Feng<sup>a</sup>, Gengkun Fang<sup>a</sup>, Di Huang<sup>a,\*</sup>,  
Jiaojiao Liang<sup>a,b\*</sup>, Ling Zhao<sup>c,\*</sup>, Zicha Li<sup>d</sup>

*a, Hunan University of Technology, College of Railway Transportation, Zhuzhou 412008, China*

*b, Qinghai Provincial Key Laboratory of Nanomaterials and Nanotechnology, Qinghai Minzu University, Qinghai 810007, China*

*c, Shandong Provincial Key Laboratory of Optical Communication Science and Technology, School of Physical Science and Information Technology, Liaocheng University, Liaocheng 252059, China*

*d, Key Laboratory of Optical Information Detecting and Display Technology, Zhejiang Normal University, Jinhua 321004, China*

\*Corresponding author: dihuang@hut.edu.cn, liangjiaojiao@hut.edu.cn, zhaoling9966@163.com

## Experimental details:

**Dataset collection:** 400 groups of devices'  $V_{oc}$  data points along with the materials' energy level directly obtain from 106 publications reported in various journals since 2015, which are applied as the available datasets in the bellowed file to analyze the potential relationship between the energy level of materials and  $V_{oc}$  in OSCs.<sup>[1-106]</sup> The datasets contains six input feature variables (the work function of hole transport layer (WFs-HTL), the work function of electron transport layer (WFs-ETL), HOMO and LUMO of the donor (HOMO<sub>(D)</sub> and LUMO<sub>(D)</sub>), HOMO and LUMO of the acceptor (HOMO<sub>(A)</sub> and LUMO<sub>(A)</sub>) and one output characteristic parameter ( $V_{oc}$ ). In most of these studies, ultraviolet photoemission spectroscopy (UPS) is used to measure the HOMO energy level of the film. The LUMO energy level of the film was characterized by inverse photoelectron spectroscopy (IPES). In the dataset, KNN algorithm is used to fill in very few missing values. Meanwhile, the dataset is randomly divided into two parts: training set (80% of dataset) for model training and testing set (20% of database) for data prediction. In small datasets, the distribution of training and testing segmentation usually change. Therefore, the dataset is randomly shuffled for many times and the average value is adopted to further ensure the reliability of learning model prediction.<sup>[107]</sup>

See “**Table S1.** Dataset of Machine Learning” for details in the below.

**Model building:** In this work, learning models are built based on the Python language environment. And four type of algorithms (K-Nearest Neighbor (KNN), Support Vector Regression

(SVR), Random Forest (RF) and eXtreme Gradient Boosting (XGBoost)) are used to evaluate the performance of model prediction. Among them, the KNN algorithm is a kind of non-parametric statistical lazy algorithm. For predicting the target value, the average of the K nearest values is assigned. In other words, the similar inputs have the similar outputs. The SVR algorithm is to solve the regression problem by fitting the training sample points on the hyperplane with a certain "tolerance limitation", which obtain the optimized model by minimizing the loss and maximizing the interval. RF algorithm is a very representative bagging ensemble algorithm. All of the base evaluators are decision trees. Based on the random sampling of bagging samples, random selection of features is added in RF. In this report, every given predicted  $V_{oc}$  result from the RF algorithm is average value by the base estimator.<sup>[108,109]</sup> XGBoost algorithm is built by the parallel construction of regression trees through multi-threading, which can control the model during the entire training process through a series of hyperparameters to greatly improve the speed and accuracy of model training.<sup>[110,111]</sup> The RF model and the XGBoost model fit relatively well among the four used ML algorithms in this work. And Both of them belong to the tree-based ML algorithms, which can provide good overall performance in prediction models because they reflect the made decisions by the vast majority of trees.

What's more, the python code is used to calculate the Pearson correlation coefficient, as follows:

```
# Prepare some needed libraries
import pandas as pd
import seaborn as sns
import matplotlib.pyplot as plt
from pandas import read_csv
from matplotlib.pyplot import savefig
# Read and fit data
filename = 'BOSCs.csv'
# names = ['WFs-HTL', 'WFs-ETL', 'HOMO(D)', 'LUMO(D)', 'HOMO(A)', 'LUMO(A)', 'Voc',
'Jsc', 'FF', 'PCE']
data = read_csv(filename)
ad = data.iloc[:, 5:11]
print(ad, type(ad))
voc = data.iloc[:, column]
jsc = data.iloc[:, column]
pce = data.iloc[:, column]
ad_voc0 = pd.concat([ad, voc], axis=1)
ad_voc1 = pd.concat([ad, jsc], axis=1)
```

```

ad_voc2 = pd.concat([ad, pce], axis=1)
ad_voc3 = ad_voc0.corr()
ad_voc4 = ad_voc1.corr()
ad_voc5 = ad_voc2.corr()
# Plot
plt.subplots(figsize=(8, 8))
sns.heatmap(ad_pce3/4/5, annot=True, vmin=-0.6, vmax=1, square=True, cmap="Greens")
savefig(".jpg")
plt.show()

```

**Performance evaluation:** As shown in Equations (1), (2) and (3), the coefficient of determination ( $R^2$ ), root mean square error (RMSE) and mean absolute error (MAE) are often used to evaluate algorithms with regression problems:

|                                                                                                                                                        |     |
|--------------------------------------------------------------------------------------------------------------------------------------------------------|-----|
| $R^2 = \frac{\left[ \sum_{i=1}^n (y_i' - \hat{y}) (y_i' - \hat{y}') \right]^2}{\sum_{i=1}^n (y_i - \hat{y})^2 \cdot \sum_{i=1}^n (y_i' - \hat{y}')^2}$ | (1) |
| $RMSE = \sqrt{\frac{\sum_{i=1}^n (y_i' - y_i)^2}{n}}$                                                                                                  | (2) |
| $MAE = \frac{1}{m} \sum_{i=1}^m  (y_i - \hat{y}_i) $                                                                                                   | (3) |

Where  $n$  is the total number of data,  $y_i$  and  $y_i'$  represent the tested and predicted values,  $\hat{y}$  and  $\hat{y}'$  are the average values of the tested and predicted values, respectively.

Pearson correlation coefficient is also called the linear correlation coefficient, which is used to detect the degree of linear correlation between two continuous variables. The calculation formula (4) of the Pearson correlation coefficient of the sample is as follows:

|                                                                                                                                   |     |
|-----------------------------------------------------------------------------------------------------------------------------------|-----|
| $r_{xy} = \frac{n \sum x_i y_i - \sum x_i \sum y_i}{\sqrt{n \sum x_i^2 - (\sum x_i)^2} \cdot \sqrt{n \sum y_i^2 - (\sum y_i)^2}}$ | (4) |
|-----------------------------------------------------------------------------------------------------------------------------------|-----|

Where,  $n$  represents the number of observation objects,  $x_i$  and  $y_i$  represent the  $i$ -th observation of  $x$  and  $y$ , respectively. It is clear that  $r$  stand for the quotient of the covariance and the standard deviation between two variables.

**Devices fabrication:** PTB7, PTB7-Th, PffBT4T-2OD were from 1Materials, PC<sub>71</sub>BM was from Nano-C, and PM6, Y6, ITIC-M were purchased from Solarmer Materials Inc. Chlorobenzene (CB) and 1,8-diodooctane (DIO) were commercially procured from J&K Scientific and Alfa Aesar with over 99.9% and 99.8% purity, respectively. All materials were purchased from suppliers and can be used without further processing. The ITO glass substrates were ultrasonically treated in special glass lotion, deionized water and ethanol for 20min in each step, respectively. And then air-dried with high-purity nitrogen. The pre-cleaned ITO were treated with ultraviolet ozone for 5min to improve the work function of ITO. Then PEDOT:PSS was spin-coated on ITO substrate for 50s at 4000rpm/min, annealed at 150°C for 15min in air, after that, the substrate was transferred to the glove box for later using. The MoOx layer was thermally evaporated onto the substrate at a rate of 0.5 Å/s under a vacuum of less than 3\*10<sup>-4</sup> Pa with 8nm thickness. The normal device structure is ITO/HTLs/Active Layer/ETLs/Ag.

Devices with PC<sub>71</sub>BM: The PTB7:PC<sub>71</sub>BM, PTB7-Th:PC<sub>71</sub>BM blended solutions (concentration is 20mg/ml and weight ratio is 1:1.5) were prepared and added 3v% DIO as additive by dissolving in CB, respectively. And the blended solutions were stirred for one day before use. The active layer film was prepared by spin coating at 1000rpm for 1min. For PffBT4T-2OD:PC<sub>71</sub>BM film, the weight ratio of was 1:1.3 and the total concentration of blend solution is 32.2mg/ml, Then PffBT4T-2OD:PC<sub>71</sub>BM solutions were stirred overnight at 110°C and spin-cast with 1000rpm for 25s onto the warm substrates which were heated by the 110°C heating platform, and the substrate with PffBT4T-2OD:PC<sub>71</sub>BM film were annealed at 80°C for 10min. LiF with a thickness of 8Å was deposited as the interface layer under the vacuum condition of 1\*10<sup>-4</sup> Pa. Finally, 100 nm Ag was deposited on the LiF as the top electrode and completed the device fabricating.

Devices with PM6: The PM6:Y6 and PM6:ITIC-M blended solutions (concentration 20mg/ml, weight ratio 1:1.2) were prepared by dissolving in CB respectively and added 0.5v% DIO as additive, the solution is heated and stirred at 45°C for 3h. The active layer was prepared by spin coating at 3000rpm/min for 30s. The substrates with the active layer was annealed at 100°C for 10min. PDINO was mixed with 1mg/ml methanol solution and spin-coated on the top of the active layer at 3000rpm/min for 50s. Finally, 100 nm Ag was deposited on PDINO as the top electrode and completed the device fabricating. The area of device is 4mm<sup>2</sup>, which is decided by the overlap area between Ag and ITO.

For the inverted device structure is ITO/ZnO/Active Layer/MoOx/Ag. The ZnO nanoparticle solution (2.5 wt%) was diluted in IPA at a ratio of 1:1, spin-coated on ITO substrate at 5000rpm for 40s, then annealed at 85°C for 10min in air, cooled to room temperature and transferred to glove box for using. The PTB7:PC<sub>71</sub>BM mixed solution was spin cast at 1000rpm for 1min on the substrate.

MoOx is deposited as the interface layer under the vacuum condition of  $1 \times 10^{-4}$  Pa, and 100 nm Ag is deposited as the electrode to complete the device fabrication.

**Devices measurement:** The current-voltage (J-V) characteristics were tested by a Keithley 2400 Source Meter under simulated solar light ( $100 \text{ mW/cm}^2$ , AM 1.5G, Abet Solar Simulator Sun2000).

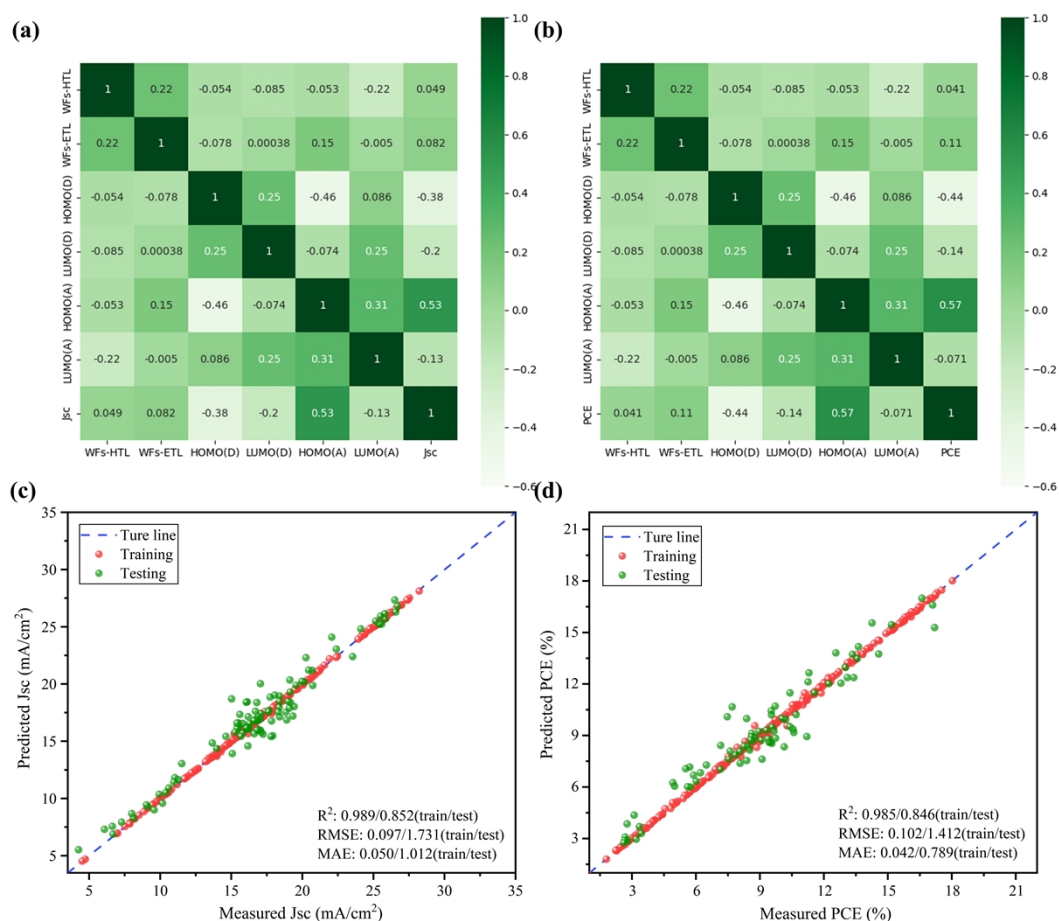

**Figure S1.** (a) Correlation matrix between  $J_{sc}$  and input features, (b) Correlation matrix between PCE and input features, (c) Correlation regression of the XGBoost model with the predicted  $J_{sc}$  and measured  $J_{sc}$ , (d) Correlation regression of the XGBoost model with the predicted PCE and measured PCE.

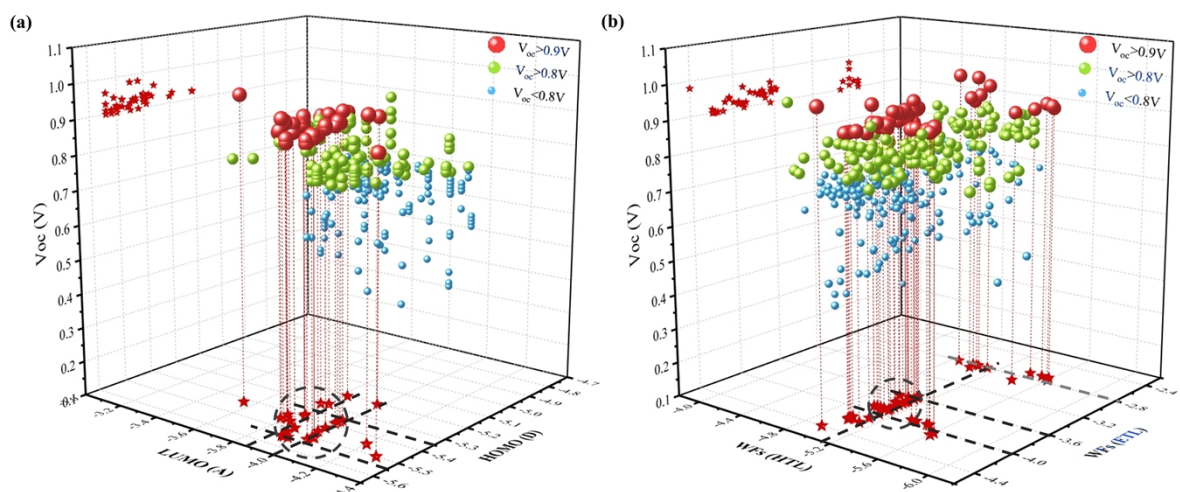

**Figure S2.** (a) The scattering interval described by  $V_{oc}$  as a function of HOMO<sub>(D)</sub> and LUMO<sub>(A)</sub>, (b) Scattering interval described by  $V_{oc}$  as a function of WFs-ETL and WFs-HTL. (The red star in the figure indicates the scattering interval of  $V_{oc}$  with over 0.9V)

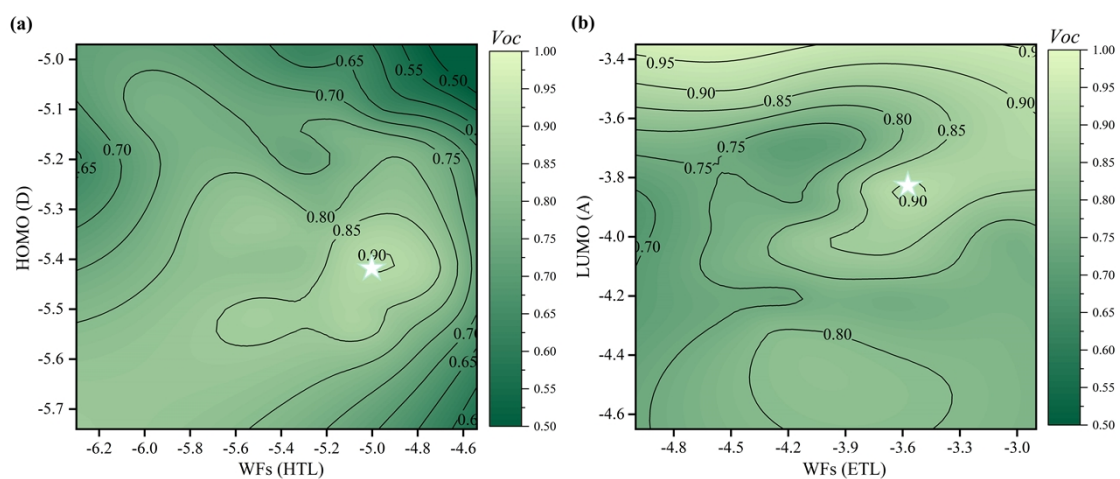

**Figure S3.** (a) The contour plot of predicted  $V_{oc}$  depends on HOMO<sub>(D)</sub> and WFs<sub>(HTL)</sub>, (b) The contour plot of predicted  $V_{oc}$  depends on LUMO<sub>(A)</sub> and WFs<sub>(ETL)</sub>.

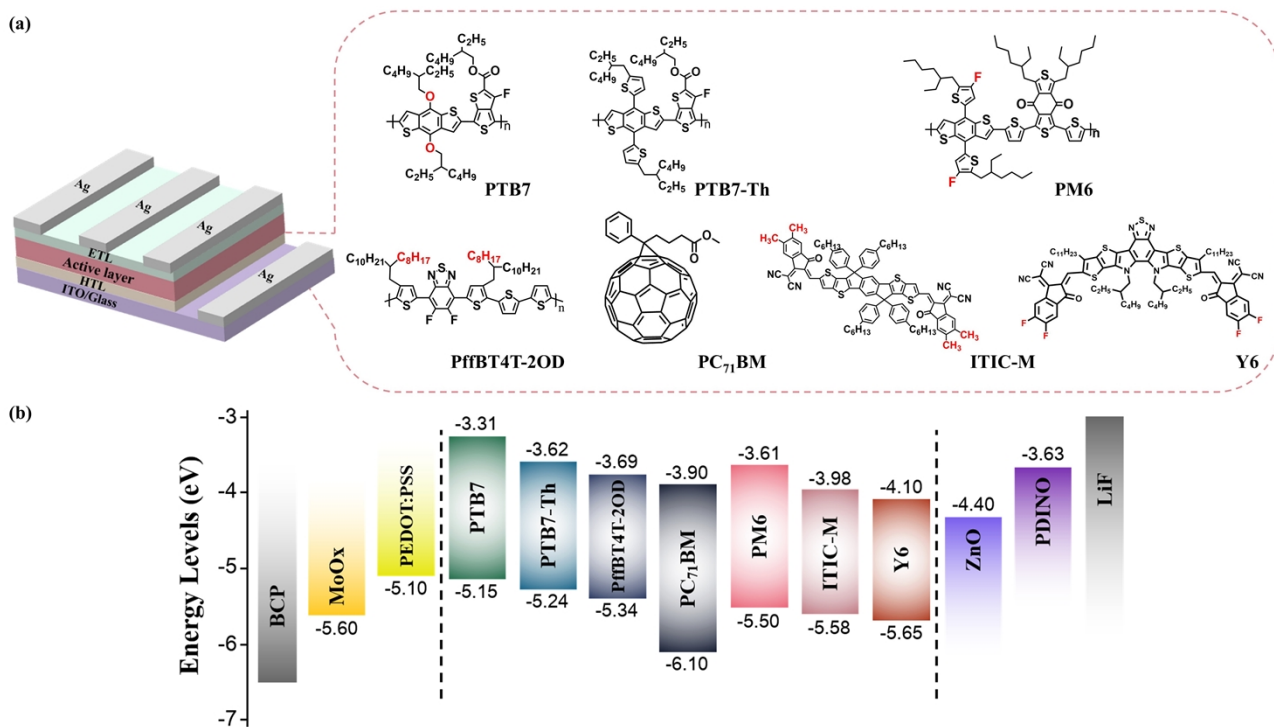

**Figure S4.** (a) The device structure and materials chemical structure of OSCs in this work, (b) Schematic diagram of energy level structure for each material.

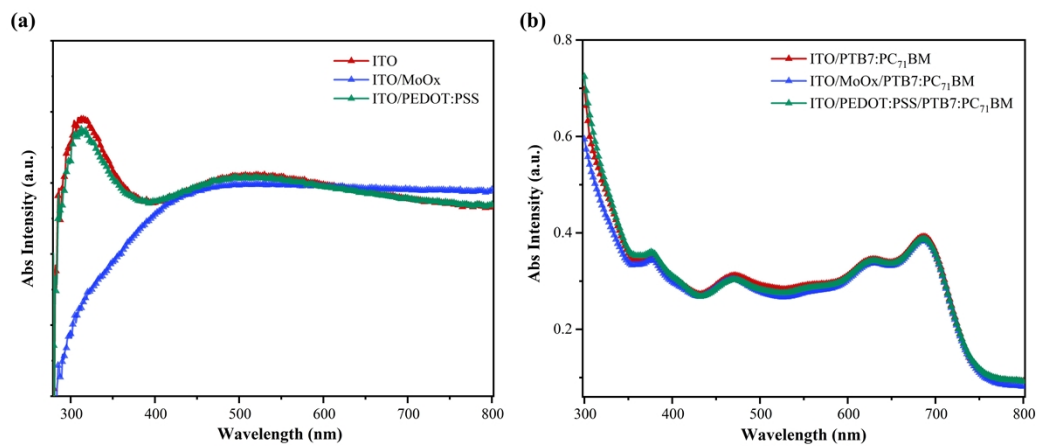

**Figure S5.** (a) Transmission spectra of different hole transport layer on ITO substrate and (b) Absorption spectra of PTB7:PC<sub>71</sub>BM films on ITO substrate with the different hole transport layer.

**Table S1.** The dataset: Experimentally measured Energy Levels and Work Functions ( $\text{HOMO}_{(D)}$  and  $\text{LUMO}_{(D)}$  of Donors,  $\text{HOMO}_{(A)}$  and  $\text{LUMO}_{(A)}$  of Acceptors, Work Functions of Hole transport materials and Electron transport materials) and Device performance parameters ( $V_{oc}$ ,  $J_{sc}$ , FF, PCE)

| HTL              | ETL              | WFs-HTL | WFs-ETL | Active Layer    | Donor     | $\text{HOMO}_{(D)}$ | $\text{LUMO}_{(D)}$ | Acceptor | $\text{HOMO}_{(A)}$ | $\text{LUMO}_{(A)}$ | $V_{oc}$ | $J_{sc}$ | FF    | PCE   | Class | Year | Ref | $ \text{HOMO}_{(D)}-\text{LUMO}_{(A)} $ | $\text{HOMO}_{(I)}$ | $\text{LUMO}_{(I)}$ |
|------------------|------------------|---------|---------|-----------------|-----------|---------------------|---------------------|----------|---------------------|---------------------|----------|----------|-------|-------|-------|------|-----|-----------------------------------------|---------------------|---------------------|
| PEDOT:PSS        | PFN-Br           | -5.10   | -2.80   | PBDB-T:ITIC     | PBDB-T    | -5.33               | -2.92               | ITIC     | -5.51               | -3.78               | 0.890    | 16.28    | 71.00 | 10.20 | 1     | 201  | 1   | 1.55                                    | 0.18                | 0.86                |
| PEDOT:PDAS       | PFN-Br           | -5.38   | -2.80   | PBDB-T:ITIC     | PBDB-T    | -5.33               | -2.92               | ITIC     | -5.51               | -3.78               | 0.890    | 15.85    | 72.00 | 9.75  | 1     | 201  | 1   | 1.55                                    | 0.18                | 0.86                |
| MoO3             | Em-Ag/AgNWs:AZO- | -5.30   | -4.31   | PBDB-T-2F:Y6    | PBDB-T-2F | -5.50               | -3.56               | Y6       | -5.65               | -4.10               | 0.832    | 25.05    | 72.97 | 15.21 | 1     | 202  | 2   | 1.40                                    | 0.15                | 0.54                |
| MoO3             | Em-Ag/AgNWs:AZO  | -5.30   | -4.28   | PBDB-T-2F:Y6    | PBDB-T-2F | -5.50               | -3.56               | Y6       | -5.65               | -4.10               | 0.826    | 21.90    | 67.38 | 12.19 | 1     | 202  | 2   | 1.40                                    | 0.15                | 0.54                |
| PCP-2F-Li        | PFN-Br           | -4.99   | -2.80   | PBDBT-2F:IT-4F  | PBDBT-2F  | -5.54               | -3.65               | IT-4F    | -5.66               | -4.14               | 0.840    | 20.40    | 73.00 | 12.70 | 1     | 201  | 3   | 1.40                                    | 0.12                | 0.49                |
| PCP-2F-Na        | PFN-Br           | -4.97   | -2.80   | PBDBT-2F:IT-4F  | PBDBT-2F  | -5.54               | -3.65               | IT-4F    | -5.66               | -4.14               | 0.810    | 19.50    | 72.00 | 11.80 | 1     | 201  | 3   | 1.40                                    | 0.12                | 0.49                |
| PCP-Li           | PFN-Br           | -4.93   | -2.80   | PBDBT-2F:IT-4F  | PBDBT-2F  | -5.54               | -3.65               | IT-4F    | -5.66               | -4.14               | 0.780    | 18.50    | 71.00 | 10.70 | 0     | 201  | 3   | 1.40                                    | 0.12                | 0.49                |
| PCP-Na           | PFN-Br           | -4.83   | -2.80   | PBDBT-2F:IT-4F  | PBDBT-2F  | -5.54               | -3.65               | IT-4F    | -5.66               | -4.14               | 0.710    | 19.00    | 67.00 | 9.72  | 0     | 201  | 3   | 1.40                                    | 0.12                | 0.49                |
| PEDOT:PSS-DA     | PNDIT-F3N        | -5.14   | -4.04   | PM6:Y6          | PM6       | -5.50               | -3.56               | Y6       | -5.65               | -4.10               | 0.845    | 25.66    | 72.10 | 15.62 | 1     | 202  | 4   | 1.40                                    | 0.15                | 0.54                |
| PEDOT:PSS        | PNDIT-F3N        | -5.00   | -4.04   | PM6:Y6          | PM6       | -5.50               | -3.56               | Y6       | -5.65               | -4.10               | 0.840    | 24.86    | 71.50 | 14.91 | 1     | 202  | 4   | 1.40                                    | 0.15                | 0.54                |
| MoO3             | TiO2/CT21        | -6.30   | -3.83   | P3HT:PCBM       | P3HT      | -5.20               | -3.30               | PCBM     | -6.10               | -3.70               | 0.610    | 6.68     | 66.70 | 2.72  | 0     | 201  | 5   | 1.50                                    | 0.90                | 0.40                |
| MoO3             | TiO2/CT23        | -6.30   | -3.81   | P3HT:PCBM       | P3HT      | -5.20               | -3.30               | PCBM     | -6.10               | -3.70               | 0.610    | 6.93     | 69.00 | 2.91  | 0     | 201  | 5   | 1.50                                    | 0.90                | 0.40                |
| MoO3             | TiO2             | -6.30   | -4.32   | P3HT:PCBM       | P3HT      | -5.20               | -3.30               | PCBM     | -6.10               | -3.70               | 0.600    | 6.63     | 66.60 | 2.65  | 0     | 201  | 5   | 1.50                                    | 0.90                | 0.40                |
| PEDOT:PSS        | PDINN            | -5.10   | -3.72   | PM6:Y6          | PM6       | -5.50               | -3.56               | Y6       | -5.65               | -4.10               | 0.847    | 25.89    | 78.59 | 17.23 | 1     | 202  | 6   | 1.40                                    | 0.15                | 0.54                |
| PEDOT:PSS        | PDINO            | -5.10   | -3.88   | PM6:Y6          | PM6       | -5.50               | -3.56               | Y6       | -5.65               | -4.10               | 0.821    | 25.58    | 72.24 | 15.17 | 1     | 202  | 6   | 1.40                                    | 0.15                | 0.54                |
| PEDOT:PSS        | LiF              | -5.20   | -4.16   | P3HT:PCBM       | P3HT      | -4.80               | -2.95               | PCBM     | -6.20               | -3.80               | 0.590    | 9.83     | 68.00 | 3.95  | 0     | 201  | 7   | 1.00                                    | 1.40                | 0.85                |
| PCP-H            | PFN-Br           | -5.11   | -2.80   | J52-2F:IT-M     | J52-2F    | -5.16               | -4.50               | IT-M     | -5.58               | -3.98               | 0.960    | 18.40    | 73.00 | 12.80 | 1     | 201  | 8   | 1.18                                    | 0.42                | 0.52                |
| PCP-Li           | PFN-Br           | -5.03   | -2.80   | J52-2F:IT-M     | J52-2F    | -5.16               | -4.50               | IT-M     | -5.58               | -3.98               | 0.930    | 18.30    | 69.80 | 11.80 | 1     | 201  | 8   | 1.18                                    | 0.42                | 0.52                |
| PCP-Na           | PFN-Br           | -4.98   | -2.80   | J52-2F:IT-M     | J52-2F    | -5.16               | -4.50               | IT-M     | -5.58               | -3.98               | 0.910    | 18.00    | 67.20 | 11.00 | 1     | 201  | 8   | 1.18                                    | 0.42                | 0.52                |
| PCP-K            | PFN-Br           | -4.87   | -2.80   | J52-2F:IT-M     | J52-2F    | -5.16               | -4.50               | IT-M     | -5.58               | -3.98               | 0.870    | 17.50    | 65.40 | 9.99  | 1     | 201  | 8   | 1.18                                    | 0.42                | 0.52                |
| PCP-Cs           | PFN-Br           | -4.78   | -2.80   | J52-2F:IT-M     | J52-2F    | -5.16               | -4.50               | IT-M     | -5.58               | -3.98               | 0.840    | 17.10    | 64.60 | 9.10  | 1     | 201  | 8   | 1.18                                    | 0.42                | 0.52                |
| MoO3             | ZnO              | -5.49   | -4.17   | PBDTTT-C-       | PBDTTT-C- | -5.11               | -3.25               | PC70BM   | -5.87               | -3.91               | 0.750    | 14.89    | 59.00 | 6.58  | 0     | 201  | 9   | 1.20                                    | 0.76                | 0.66                |
| MoO3             | SASB             | -5.49   | -4.22   | PBDTTT-C-       | PBDTTT-C- | -5.11               | -3.25               | PC70BM   | -5.87               | -3.91               | 0.750    | 13.66    | 61.00 | 6.21  | 0     | 201  | 9   | 1.20                                    | 0.76                | 0.66                |
| PEDOT:PSS        | PAMPS-Na         | -5.00   | -3.24   | PBDT-ST1:PC71BM | PBDT-ST1  | -5.53               | -3.57               | PC71BM   | -6.10               | -3.90               | 0.890    | 13.62    | 73.00 | 9.09  | 1     | 201  | 10  | 1.25                                    | 0.95                | 0.59                |
| PEDOT:PSS        | PAMPS-Na         | -5.00   | -3.24   | PTB7-Th:PC71BM  | PTB7-Th   | -5.24               | -3.62               | PC71BM   | -6.10               | -3.90               | 0.800    | 15.76    | 70.00 | 9.16  | 1     | 201  | 10  | 1.34                                    | 0.86                | 0.28                |
| PEDOT:PSS        | PAMPS-Na         | -5.00   | -3.24   | PTB7:PC71BM     | PTB7      | -5.15               | -3.31               | PC71BM   | -6.10               | -3.90               | 0.790    | 15.64    | 64.00 | 8.24  | 0     | 201  | 10  | 1.63                                    | 0.57                | 0.33                |
| MXene/PEDOT:PSS  | PDINO            | -5.22   | -3.50   | PBDB-T:ITIC     | PBDB-T    | -5.33               | -2.92               | ITIC     | -5.51               | -3.50               | 0.860    | 13.98    | 64.00 | 7.70  | 1     | 201  | 11  | 1.22                                    | 0.58                | 0.36                |
| MXene/PEDOT:PSS  | PrC60MA          | -5.22   | -3.90   | PTB7-Th:PC71BM  | PTB7-Th   | -5.22               | -3.64               | PC71BM   | -5.80               | -4.00               | 0.790    | 14.62    | 61.00 | 7.16  | 0     | 201  | 11  | 1.83                                    | 0.18                | 0.58                |
| PEDOT:PSS        | PAMAM            | -5.05   | -4.06   | PBDB-T:ITIC     | PBDB-T    | -5.33               | -2.92               | ITIC     | -5.51               | -3.78               | 0.890    | 16.77    | 62.00 | 9.25  | 1     | 201  | 12  | 1.55                                    | 0.18                | 0.86                |
| PEDOT:PSS/4083   | PDINO            | -5.05   | -3.63   | PBDB-T:IT-M     | PBDB-T    | -5.21               | -3.41               | IT-M     | -5.48               | -3.83               | 0.930    | 14.75    | 68.71 | 9.42  | 1     | 201  | 13  | 1.38                                    | 0.27                | 0.42                |
| PEDOT:PSS/Room-T | PDINO            | -4.91   | -3.63   | PBDB-T:IT-M     | PBDB-T    | -5.21               | -3.41               | IT-M     | -5.48               | -3.83               | 0.925    | 16.01    | 71.61 | 10.60 | 1     | 201  | 13  | 1.38                                    | 0.27                | 0.42                |
| PEDOT:PSS/High-T | PDINO            | -4.80   | -3.63   | PBDB-T:IT-M     | PBDB-T    | -5.21               | -3.41               | IT-M     | -5.48               | -3.83               | 0.890    | 15.90    | 67.98 | 9.58  | 1     | 201  | 13  | 1.38                                    | 0.27                | 0.42                |
| PEDOT:PSS        | Bis-C60          | -5.00   | -3.90   | PCE10:PC71BM    | PCE10     | -5.20               | -3.60               | PC71BM   | -6.00               | -3.90               | 0.790    | 16.38    | 66.10 | 8.60  | 0     | 201  | 14  | 1.30                                    | 0.80                | 0.30                |
| PhNa-1T          | Bis-C60          | -5.20   | -3.90   | PCE10:PC71BM    | PCE10     | -5.20               | -3.60               | PC71BM   | -6.00               | -3.90               | 0.790    | 17.07    | 71.10 | 9.66  | 0     | 201  | 14  | 1.30                                    | 0.80                | 0.30                |



|              |           |       |       |                |         |       |       |         |       |       |       |       |       |       |   |     |    |      |      |      |
|--------------|-----------|-------|-------|----------------|---------|-------|-------|---------|-------|-------|-------|-------|-------|-------|---|-----|----|------|------|------|
| PEDOT:PSS    | TiO2      | -5.00 | -4.30 | PCE10:PC71BM   | PCE10   | -5.20 | -3.60 | PC71BM  | -6.00 | -3.90 | 0.790 | 16.18 | 63.70 | 8.11  | 0 | 201 | 14 | 1.30 | 0.80 | 0.30 |
| PhNa-1T      | TiO2      | -5.20 | -4.30 | PCE10:PC71BM   | PCE10   | -5.20 | -3.60 | PC71BM  | -6.00 | -3.90 | 0.790 | 16.75 | 67.00 | 8.85  | 0 | 201 | 14 | 1.30 | 0.80 | 0.30 |
| PEDOT:PSS    | TiO2      | -5.00 | -4.30 | PTB7:PC71BM    | PTB7    | -5.20 | -3.60 | PC71BM  | -6.00 | -3.90 | 0.750 | 15.19 | 66.00 | 7.51  | 0 | 201 | 14 | 1.30 | 0.80 | 0.30 |
| PhNa-1P      | TiO2      | -5.40 | -4.30 | PTB7:PC71BM    | PTB7    | -5.20 | -3.60 | PC71BM  | -6.00 | -3.90 | 0.750 | 14.73 | 32.00 | 3.52  | 0 | 201 | 14 | 1.30 | 0.80 | 0.30 |
| PhNa-1T      | TiO2      | -5.20 | -4.30 | PTB7:PC71BM    | PTB7    | -5.20 | -3.60 | PC71BM  | -6.00 | -3.90 | 0.750 | 16.05 | 68.60 | 8.26  | 0 | 201 | 14 | 1.30 | 0.80 | 0.30 |
| PhNa-2T      | TiO2      | -5.20 | -4.30 | PTB7:PC71BM    | PTB7    | -5.20 | -3.60 | PC71BM  | -6.00 | -3.90 | 0.750 | 15.62 | 67.10 | 7.93  | 0 | 201 | 14 | 1.30 | 0.80 | 0.30 |
| PhNa-3T      | TiO2      | -5.10 | -4.30 | PTB7:PC71BM    | PTB7    | -5.20 | -3.60 | PC71BM  | -6.00 | -3.90 | 0.740 | 16.17 | 62.90 | 7.54  | 0 | 201 | 14 | 1.30 | 0.80 | 0.30 |
| MoO3         | ZnO/S-GQD | -5.60 | -3.95 | PTB7:PC71BM    | PTB7    | -5.15 | -3.31 | PC71BM  | -6.00 | -4.00 | 0.760 | 17.24 | 73.00 | 9.56  | 0 | 201 | 15 | 1.15 | 0.85 | 0.69 |
| MoO3         | ZnO/M-GQD | -5.60 | -4.07 | PTB7:PC71BM    | PTB7    | -5.15 | -3.31 | PC71BM  | -6.00 | -4.00 | 0.760 | 17.91 | 74.50 | 10.14 | 0 | 201 | 15 | 1.15 | 0.85 | 0.69 |
| MoO3         | ZnO/L-GQD | -5.60 | -4.26 | PTB7:PC71BM    | PTB7    | -5.15 | -3.31 | PC71BM  | -6.00 | -4.00 | 0.760 | 17.47 | 73.60 | 9.77  | 0 | 201 | 15 | 1.15 | 0.85 | 0.69 |
| MoO3         | ZnO       | -5.60 | -4.40 | PTB7:PC71BM    | PTB7    | -5.15 | -3.31 | PC71BM  | -6.00 | -4.00 | 0.750 | 16.80 | 69.50 | 8.76  | 0 | 201 | 15 | 1.15 | 0.85 | 0.69 |
| PEDOT:PSS    | CTOC-N-Br | -5.10 | -4.09 | PM6:BTP-4Cl    | PM6     | -5.00 | -2.62 | BTP-4Cl | -5.66 | -4.09 | 0.840 | 26.57 | 77.00 | 17.19 | 1 | 202 | 16 | 0.91 | 0.66 | 1.47 |
| PEDOT:PSS    | CTOC-N    | -5.10 | -4.37 | PM6:BTP-4Cl    | PM6     | -5.00 | -2.62 | BTP-4Cl | -5.66 | -4.09 | 0.822 | 26.28 | 75.00 | 16.22 | 1 | 202 | 16 | 0.91 | 0.66 | 1.47 |
| PEDOT:PSS    | CTOC      | -5.10 | -4.19 | PM6:BTP-4Cl    | PM6     | -5.00 | -2.62 | BTP-4Cl | -5.66 | -4.09 | 0.810 | 26.02 | 71.00 | 15.05 | 1 | 202 | 16 | 0.91 | 0.66 | 1.47 |
| GO:F5BnPA    | Ca        | -5.52 | -2.70 | SMPV1:PC71BM   | SMPV1   | -5.50 | -3.50 | PC71BM  | -5.80 | -4.00 | 0.920 | 11.96 | 46.59 | 5.13  | 1 | 201 | 17 | 1.50 | 0.30 | 0.50 |
| MoOx:F5BnPA  | Ca        | -5.58 | -2.70 | SMPV1:PC71BM   | SMPV1   | -5.50 | -3.50 | PC71BM  | -5.80 | -4.00 | 0.910 | 11.69 | 55.92 | 5.96  | 1 | 201 | 17 | 1.50 | 0.30 | 0.50 |
| MoOx         | Ca        | -5.35 | -2.70 | SMPV1:PC71BM   | SMPV1   | -5.50 | -3.50 | PC71BM  | -5.80 | -4.00 | 0.880 | 10.96 | 50.81 | 4.92  | 1 | 201 | 17 | 1.50 | 0.30 | 0.50 |
| GO           | Ca        | -4.92 | -2.70 | SMPV1:PC71BM   | SMPV1   | -5.50 | -3.50 | PC71BM  | -5.80 | -4.00 | 0.650 | 11.03 | 43.28 | 3.10  | 0 | 201 | 17 | 1.50 | 0.30 | 0.50 |
| MoOx         | Ba(OH)2   | -5.49 | -3.80 | PTB7-Th:PC70BM | PTB7-Th | -5.22 | -3.64 | PC70BM  | -6.10 | -4.30 | 0.818 | 15.69 | 67.60 | 8.66  | 1 | 201 | 18 | 0.92 | 0.88 | 0.66 |
| MoOx         | ZnO       | -5.49 | -4.30 | PTB7-Th:PC70BM | PTB7-Th | -5.22 | -3.64 | PC70BM  | -6.10 | -4.30 | 0.803 | 14.28 | 62.30 | 7.12  | 1 | 201 | 18 | 0.92 | 0.88 | 0.66 |
| PEDOT:PSS    | PDINO     | -5.11 | -3.64 | PTQ10:IDIC     | PTQ10   | -5.54 | -2.98 | IDIC    | -5.73 | -3.91 | 0.960 | 16.80 | 72.02 | 11.56 | 1 | 201 | 19 | 1.61 | 0.26 | 0.95 |
| PEDOT:PSS-GO | PDINO-G   | -5.00 | -3.86 | PTQ10:IDIC     | PTQ10   | -5.54 | -2.98 | IDIC    | -5.73 | -3.91 | 0.960 | 17.43 | 74.34 | 12.44 | 1 | 201 | 19 | 1.61 | 0.26 | 0.95 |
| PEDOT:PSS-GO | PDINO-G   | -5.00 | -3.86 | PTQ10:IDIC-2F  | PTQ10   | -5.54 | -2.98 | IDIC-2F | -5.80 | -3.93 | 0.910 | 19.09 | 74.87 | 13.01 | 1 | 201 | 19 | 1.61 | 0.26 | 0.95 |
| PEDOT:PSS    | PDINO-G   | -5.11 | -3.86 | PTQ10:IDIC-2F  | PTQ10   | -5.54 | -2.98 | IDIC-2F | -5.80 | -3.93 | 0.910 | 18.57 | 74.43 | 12.58 | 1 | 201 | 19 | 1.61 | 0.26 | 0.95 |
| PEDOT:PSS    | PDINO     | -5.11 | -3.64 | PTQ10:IDIC-2F  | PTQ10   | -5.54 | -2.98 | IDIC-2F | -5.80 | -3.93 | 0.900 | 18.06 | 72.66 | 11.81 | 1 | 201 | 19 | 1.46 | 0.09 | 0.60 |
| PEDOT:PSS-GO | PDINO     | -5.00 | -3.64 | PTQ10:IDIC-2F  | PTQ10   | -5.54 | -2.98 | IDIC-2F | -5.80 | -3.93 | 0.900 | 18.39 | 73.92 | 12.23 | 1 | 201 | 19 | 1.46 | 0.09 | 0.60 |
| PEDOT:PSS-GO | PDINO-G   | -5.00 | -3.86 | PM6:Y6         | PM6     | -5.56 | -3.50 | Y6      | -5.65 | -4.10 | 0.850 | 25.65 | 75.78 | 16.52 | 1 | 201 | 19 | 1.63 | 0.19 | 0.93 |
| PEDOT:PSS    | PDINO     | -5.11 | -3.64 | PM6:Y6         | PM6     | -5.56 | -3.50 | Y6      | -5.65 | -4.10 | 0.840 | 24.84 | 73.43 | 15.32 | 1 | 201 | 19 | 1.63 | 0.19 | 0.93 |
| MoO3         | SnO2      | -5.60 | -4.06 | PM6:IT-4F      | PM6     | -5.56 | -3.50 | IT-4F   | -5.59 | -3.50 | 0.850 | 21.30 | 78.00 | 14.10 | 1 | 201 | 20 | 2.06 | 0.03 | 0.00 |
| MoO3         | ZnO       | -5.60 | -3.80 | PM6:IT-4F      | PM6     | -5.56 | -3.50 | IT-4F   | -5.59 | -3.50 | 0.840 | 20.70 | 75.00 | 13.00 | 1 | 201 | 20 | 2.06 | 0.03 | 0.00 |
| U-MXene      | Ca        | -5.01 | -2.70 | PBDB-T:ITIC    | PBDB-T  | -5.33 | -2.92 | ITIC    | -5.51 | -3.78 | 0.890 | 15.98 | 64.00 | 9.02  | 1 | 201 | 21 | 1.55 | 0.18 | 0.86 |
| MoO3         | UH-MXene  | -5.49 | -4.30 | PBDB-T:ITIC    | PBDB-T  | -5.33 | -2.92 | ITIC    | -5.51 | -3.78 | 0.870 | 17.36 | 60.00 | 9.06  | 1 | 201 | 21 | 1.55 | 0.18 | 0.86 |
| MoOx         | ZnO/PEIE  | -5.60 | -4.00 | M1:PC70BM      | M1      | -5.29 | -3.45 | PC70BM  | -5.87 | -3.91 | 0.897 | 12.50 | 61.60 | 6.91  | 1 | 201 | 22 | 1.38 | 0.58 | 0.46 |
| MoOx         | ZnO       | -5.60 | -4.50 | M1:PC70BM      | M1      | -5.29 | -3.45 | PC70BM  | -5.87 | -3.91 | 0.855 | 11.90 | 61.50 | 6.25  | 1 | 201 | 22 | 1.38 | 0.58 | 0.46 |
| 0.1MHClO4-   | PDINN     | -5.39 | -3.72 | PM6:Y6         | PM6     | -5.56 | -3.50 | Y6      | -5.65 | -4.10 | 0.850 | 25.83 | 74.80 | 16.44 | 1 | 202 | 23 | 1.46 | 0.09 | 0.60 |
| 0.1MHClO4-   | PDINO     | -5.39 | -3.88 | PM6:Y6         | PM6     | -5.56 | -3.50 | Y6      | -5.65 | -4.10 | 0.850 | 24.49 | 73.20 | 15.24 | 1 | 202 | 23 | 1.46 | 0.09 | 0.60 |
| CH3SO3H-     | PDINN     | -4.91 | -3.72 | PM6:Y6         | PM6     | -5.56 | -3.50 | Y6      | -5.65 | -4.10 | 0.830 | 24.71 | 68.30 | 14.01 | 1 | 202 | 23 | 1.46 | 0.09 | 0.60 |
| PEDOT:PSS    | PFN/NBR   | -5.00 | -4.92 | PTB7-Th:PC71BM | PTB7-Th | -5.31 | -3.72 | PC71BM  | -6.10 | -3.90 | 0.800 | 15.27 | 53.00 | 6.49  | 1 | 201 | 24 | 1.41 | 0.79 | 0.18 |

|               |           |       |       |                 |           |       |       |         |       |       |       |       |       |       |   |     |    |      |      |      |
|---------------|-----------|-------|-------|-----------------|-----------|-------|-------|---------|-------|-------|-------|-------|-------|-------|---|-----|----|------|------|------|
| MoO3          | PFN/NBR   | -5.60 | -4.92 | PTB7-Th:PC71BM  | PTB7-Th   | -5.31 | -3.72 | PC71BM  | -6.10 | -3.90 | 0.730 | 15.95 | 56.00 | 6.59  | 0 | 201 | 24 | 1.41 | 0.79 | 0.18 |
| MoO3          | PFN       | -5.60 | -5.02 | PTB7-Th:PC71BM  | PTB7-Th   | -5.31 | -3.72 | PC71BM  | -6.10 | -3.90 | 0.610 | 13.56 | 54.00 | 4.41  | 0 | 201 | 24 | 1.41 | 0.79 | 0.18 |
| MoO3          | NBR       | -5.60 | -4.97 | PTB7-Th:PC71BM  | PTB7-Th   | -5.31 | -3.72 | PC71BM  | -6.10 | -3.90 | 0.550 | 14.68 | 54.00 | 4.29  | 0 | 201 | 24 | 1.41 | 0.79 | 0.18 |
| MoO3          | ZnO/L-Arg | -5.30 | -3.74 | PTB7-Th:PC71BM  | PTB7-Th   | -5.20 | -3.64 | PC71BM  | -6.10 | -4.00 | 0.780 | 17.49 | 68.22 | 9.31  | 0 | 201 | 25 | 1.20 | 0.90 | 0.36 |
| MoO3          | ZnO       | -5.30 | -4.34 | PTB7-Th:PC71BM  | PTB7-Th   | -5.20 | -3.64 | PC71BM  | -6.10 | -4.00 | 0.770 | 16.30 | 64.45 | 8.09  | 0 | 201 | 25 | 1.20 | 0.90 | 0.36 |
| MoO3          | L-Arg     | -5.30 | -3.97 | PTB7-Th:PC71BM  | PTB7-Th   | -5.20 | -3.64 | PC71BM  | -6.10 | -4.00 | 0.770 | 17.25 | 67.80 | 9.00  | 0 | 201 | 25 | 1.20 | 0.90 | 0.36 |
| PH1000/Gra    | Ca        | -4.90 | -2.90 | PCDTBT:PC71BM   | PCDTBT    | -5.50 | -3.60 | PC71BM  | -6.00 | -4.00 | 0.840 | 12.63 | 42.35 | 4.44  | 1 | 201 | 26 | 1.50 | 0.50 | 0.40 |
| PH1000        | Ca        | -5.00 | -2.90 | PCDTBT:PC71BM   | PCDTBT    | -5.50 | -3.60 | PC71BM  | -6.00 | -4.00 | 0.820 | 9.03  | 41.78 | 3.09  | 1 | 201 | 26 | 1.50 | 0.50 | 0.40 |
| Gra           | Ca        | -4.60 | -2.90 | PCDTBT:PC71BM   | PCDTBT    | -5.50 | -3.60 | PC71BM  | -6.00 | -4.00 | 0.800 | 9.45  | 35.56 | 2.68  | 1 | 201 | 26 | 1.50 | 0.50 | 0.40 |
| MoOx          | LiF       | -6.00 | -2.60 | PTB7:PCBM       | PTB7      | -5.20 | -3.30 | PCBM    | -6.10 | -4.00 | 0.740 | 15.50 | 64.00 | 7.31  | 0 | 201 | 27 | 1.20 | 0.90 | 0.50 |
| PEDOT:PSS/CNT | LiF       | -5.40 | -2.60 | PTB7:PCBM       | PTB7      | -5.20 | -3.30 | PCBM    | -6.10 | -4.00 | 0.720 | 13.70 | 61.00 | 6.04  | 0 | 201 | 27 | 1.20 | 0.90 | 0.70 |
| MoOx          | LiF       | -6.00 | -2.60 | P3HT:PCBM       | P3HT      | -5.20 | -3.50 | PCBM    | -6.10 | -4.00 | 0.600 | 9.42  | 50.00 | 2.83  | 0 | 201 | 27 | 1.20 | 0.90 | 0.50 |
| PEDOT:PSS/CNT | LiF       | -5.40 | -2.60 | P3HT:PCBM       | P3HT      | -5.20 | -3.50 | PCBM    | -6.10 | -4.00 | 0.590 | 8.84  | 46.00 | 2.43  | 0 | 201 | 27 | 1.20 | 0.90 | 0.70 |
| HPMO:Sn       | PFN-Br    | -5.42 | -2.70 | PBDB-T:ITIC     | PBDB-T    | -5.33 | -2.92 | ITIC    | -5.51 | -3.78 | 0.900 | 16.62 | 70.80 | 10.59 | 1 | 202 | 28 | 1.42 | 0.17 | 0.49 |
| HPMO:Sn       | PFN-Br    | -5.42 | -2.70 | PM6:IT-4F       | PM6       | -5.48 | -3.66 | IT-4F   | -5.65 | -4.12 | 0.860 | 20.25 | 76.40 | 13.34 | 1 | 202 | 28 | 1.22 | 0.58 | 0.36 |
| HPMO:Sn       | PFN-Br    | -5.42 | -2.70 | PM6:BTP-eC9     | PM6(PBDB- | -5.47 | -3.56 | BTP-eC9 | -5.64 | -4.05 | 0.840 | 26.80 | 77.00 | 17.30 | 1 | 202 | 28 | 1.55 | 0.18 | 0.86 |
| HPMO:Sn       | PFN-Br    | -5.42 | -2.70 | PTB7-Th:PC71BM  | PTB7-Th   | -5.22 | -3.64 | PC71BM  | -5.80 | -4.00 | 0.800 | 16.59 | 64.60 | 8.57  | 1 | 202 | 28 | 1.36 | 0.17 | 0.46 |
| IZO-MoO3      | Ca        | -5.23 | -2.98 | P3HT:PCBM       | P3HT      | -5.00 | -3.00 | PCBM    | -6.50 | -4.00 | 0.601 | 7.87  | 64.06 | 3.03  | 0 | 201 | 29 | 1.00 | 1.50 | 1.00 |
| MIZO          | Ca        | -5.17 | -2.98 | P3HT:PCBM       | P3HT      | -5.00 | -3.00 | PCBM    | -6.50 | -4.00 | 0.592 | 8.12  | 66.53 | 3.20  | 0 | 201 | 29 | 1.00 | 1.50 | 1.00 |
| IZO           | Ca        | -5.05 | -2.98 | P3HT:PCBM       | P3HT      | -5.00 | -3.00 | PCBM    | -6.50 | -4.00 | 0.535 | 8.00  | 64.94 | 2.79  | 0 | 201 | 29 | 1.00 | 1.50 | 1.00 |
| PEDOT:PSS     | PFN       | -5.10 | -4.30 | PTB7-Th:PC71BM  | PTB7-Th   | -5.20 | -3.60 | PC71BM  | -6.00 | -4.30 | 0.780 | 15.60 | 72.00 | 8.76  | 0 | 201 | 30 | 0.90 | 0.80 | 0.70 |
| p-PFP-MD      | PFN       | -5.05 | -4.30 | PTB7-Th:PC71BM  | PTB7-Th   | -5.20 | -3.60 | PC71BM  | -6.00 | -4.30 | 0.780 | 15.90 | 70.00 | 8.70  | 0 | 201 | 30 | 0.90 | 0.80 | 0.70 |
| p-PFP-HD      | PFN       | -5.14 | -4.30 | PTB7-Th:PC71BM  | PTB7-Th   | -5.20 | -3.60 | PC71BM  | -6.00 | -4.30 | 0.780 | 16.30 | 71.00 | 9.03  | 0 | 201 | 30 | 0.90 | 0.80 | 0.70 |
| p-PFP-WD      | PFN       | -4.99 | -4.30 | PTB7-Th:PC71BM  | PTB7-Th   | -5.20 | -3.60 | PC71BM  | -6.00 | -4.30 | 0.750 | 15.60 | 61.00 | 7.19  | 0 | 201 | 30 | 0.90 | 0.80 | 0.70 |
| MoO3          | ZnO-C60   | -5.49 | -4.53 | PTB7-Th:PC71BM  | PTB7-Th   | -5.22 | -3.64 | PC71BM  | -5.80 | -4.00 | 0.800 | 15.73 | 74.30 | 9.35  | 1 | 201 | 31 | 1.14 | 0.66 | 0.49 |
| MoO3          | ZnO       | -5.49 | -4.14 | PTB7-Th:PC71BM  | PTB7-Th   | -5.22 | -3.64 | PC71BM  | -5.80 | -4.00 | 0.790 | 14.02 | 69.10 | 7.64  | 0 | 201 | 31 | 1.14 | 0.66 | 0.49 |
| MoO3          | ZnO-C60   | -5.49 | -4.53 | PTB7:PC71BM     | PTB7      | -5.14 | -3.51 | PC71BM  | -5.80 | -4.00 | 0.730 | 15.41 | 73.00 | 8.21  | 0 | 201 | 31 | 1.22 | 0.58 | 0.36 |
| MoO3          | ZnO       | -5.49 | -4.14 | PTB7:PC71BM     | PTB7      | -5.14 | -3.51 | PC71BM  | -5.80 | -4.00 | 0.700 | 13.75 | 69.00 | 6.65  | 0 | 201 | 31 | 1.22 | 0.58 | 0.36 |
| PEDOT:PSS     | PFN-Br    | -4.80 | -3.00 | PBDB-T-SF:IT-4F | PBDB-T-SF | -5.42 | -3.64 | IT-4F   | -5.70 | -4.10 | 0.900 | 20.20 | 72.00 | 13.10 | 1 | 201 | 32 | 1.32 | 0.28 | 0.46 |
| WS2           | PFN-Br    | -5.50 | -3.00 | PBDB-T-SF:IT-4F | PBDB-T-SF | -5.42 | -3.64 | IT-4F   | -5.70 | -4.10 | 0.880 | 20.60 | 74.00 | 13.50 | 1 | 201 | 32 | 1.32 | 0.28 | 0.46 |
| PEDOT:PSS     | PFN-Br    | -4.80 | -3.00 | PBDB-T-SF:Y6    | PBDB-T-SF | -5.42 | -3.64 | Y6      | -5.60 | -4.30 | 0.850 | 25.20 | 72.00 | 15.30 | 1 | 201 | 32 | 1.32 | 0.28 | 0.46 |
| MoS2          | PFN-Br    | -5.40 | -3.00 | PBDB-T-SF:IT-4F | PBDB-T-SF | -5.42 | -3.64 | IT-4F   | -5.70 | -4.10 | 0.840 | 20.00 | 71.00 | 12.00 | 1 | 201 | 32 | 1.12 | 0.18 | 0.66 |
| WS2           | PFN-Br    | -5.50 | -3.00 | PBDB-T-SF:Y6    | PBDB-T-SF | -5.42 | -3.64 | Y6      | -5.60 | -4.30 | 0.840 | 25.90 | 73.00 | 15.80 | 1 | 201 | 32 | 1.12 | 0.18 | 0.66 |
| PEDOT:PSS     | PFN-Br    | -5.15 | -2.85 | PM6:BTP-eC9     | PM6       | -5.25 | -2.91 | BTP-eC9 | -5.87 | -3.89 | 0.854 | 26.28 | 78.20 | 17.52 | 1 | 202 | 33 | 1.39 | 0.61 | 0.95 |
| 2PACz         | PFN-Br    | -5.45 | -2.85 | PM6:BTP-eC9     | PM6       | -5.25 | -2.91 | BTP-eC9 | -5.87 | -3.89 | 0.845 | 26.94 | 79.20 | 18.03 | 1 | 202 | 33 | 1.39 | 0.61 | 0.95 |
| PEDOT:PSS     | PFN-Br    | -5.15 | -2.85 | PM6:N3          | PM6       | -5.25 | -2.91 | N3      | -5.86 | -3.86 | 0.842 | 25.64 | 73.90 | 15.94 | 1 | 202 | 33 | 1.36 | 0.62 | 0.98 |
| 2PACz         | PFN-Br    | -5.45 | -2.85 | PM6:N3          | PM6       | -5.25 | -2.91 | N3      | -5.86 | -3.86 | 0.840 | 26.53 | 74.50 | 16.60 | 1 | 202 | 33 | 1.36 | 0.62 | 0.98 |
| PEDOT:PSS-PA  | PNDIT-F3N | -5.49 | -3.95 | PM6:ITC-2Cl     | PM6       | -5.50 | -3.61 | ITC-2Cl | -5.58 | -4.01 | 0.919 | 19.56 | 75.70 | 13.62 | 1 | 202 | 34 | 1.40 | 0.10 | 0.49 |

|              |           |       |       |                |         |       |       |         |       |       |       |       |       |       |   |     |    |      |      |      |
|--------------|-----------|-------|-------|----------------|---------|-------|-------|---------|-------|-------|-------|-------|-------|-------|---|-----|----|------|------|------|
| PEDOT:PSS-TA | PNDIT-F3N | -5.47 | -3.95 | PM6:ITC-2Cl    | PM6     | -5.50 | -3.61 | ITC-2Cl | -5.58 | -4.01 | 0.917 | 19.60 | 77.10 | 13.87 | 1 | 202 | 34 | 1.40 | 0.10 | 0.49 |
| PEDOT:PSS-DA | PNDIT-F3N | -5.38 | -3.95 | PM6:ITC-2Cl    | PM6     | -5.50 | -3.61 | ITC-2Cl | -5.58 | -4.01 | 0.916 | 20.06 | 77.10 | 14.17 | 1 | 202 | 34 | 1.40 | 0.10 | 0.49 |
| PEDOT:PSS    | PNDIT-F3N | -5.34 | -3.95 | PM6:ITC-2Cl    | PM6     | -5.50 | -3.61 | ITC-2Cl | -5.58 | -4.01 | 0.912 | 19.48 | 75.50 | 13.42 | 1 | 202 | 34 | 1.40 | 0.10 | 0.49 |
| PEDOT:PSS-PA | PNDIT-F3N | -5.49 | -3.95 | PM6:Y6         | PM6     | -5.50 | -3.61 | Y6      | -5.60 | -4.10 | 0.853 | 25.50 | 77.60 | 16.88 | 1 | 202 | 34 | 1.49 | 0.08 | 0.40 |
| PEDOT:PSS-TA | PNDIT-F3N | -5.47 | -3.95 | PM6:Y6         | PM6     | -5.50 | -3.61 | Y6      | -5.60 | -4.10 | 0.846 | 25.82 | 78.20 | 17.10 | 1 | 202 | 34 | 1.49 | 0.08 | 0.40 |
| PEDOT:PSS-DA | PNDIT-F3N | -5.38 | -3.95 | PM6:Y6         | PM6     | -5.50 | -3.61 | Y6      | -5.60 | -4.10 | 0.845 | 25.64 | 77.70 | 16.83 | 1 | 202 | 34 | 1.49 | 0.08 | 0.40 |
| PEDOT:PSS    | PNDIT-F3N | -5.34 | -3.95 | PM6:Y6         | PM6     | -5.50 | -3.61 | Y6      | -5.60 | -4.10 | 0.840 | 25.47 | 77.10 | 16.52 | 1 | 202 | 34 | 1.49 | 0.08 | 0.40 |
| PEDOT:PSS-PA | PNDIT-F3N | -5.49 | -3.95 | PM6:PIDTC-T    | PM6     | -5.50 | -3.61 | PIDTC-T | -5.99 | -4.05 | 0.831 | 16.34 | 70.40 | 9.55  | 1 | 202 | 34 | 1.45 | 0.49 | 0.44 |
| PEDOT:PSS-TA | PNDIT-F3N | -5.47 | -3.95 | PM6:PIDTC-T    | PM6     | -5.50 | -3.61 | PIDTC-T | -5.99 | -4.05 | 0.830 | 16.16 | 67.60 | 9.07  | 1 | 202 | 34 | 1.45 | 0.49 | 0.44 |
| PEDOT:PSS-DA | PNDIT-F3N | -5.38 | -3.95 | PM6:PIDTC-T    | PM6     | -5.50 | -3.61 | PIDTC-T | -5.99 | -4.05 | 0.825 | 15.81 | 64.30 | 8.38  | 1 | 202 | 34 | 1.45 | 0.49 | 0.44 |
| PEDOT:PSS    | PNDIT-F3N | -5.34 | -3.95 | PM6:PIDTC-T    | PM6     | -5.50 | -3.61 | PIDTC-T | -5.99 | -4.05 | 0.821 | 15.27 | 56.20 | 7.05  | 1 | 202 | 34 | 1.45 | 0.49 | 0.44 |
| PEDOT:PSS    | PFN-2TNDI | -5.10 | -4.00 | PBDB-T:ITIC    | PBDB-T  | -5.33 | -2.92 | ITIC    | -5.48 | -3.83 | 0.920 | 16.59 | 70.00 | 11.10 | 1 | 201 | 35 | 1.50 | 0.15 | 0.91 |
| PEDOT:PSS    | PFN       | -5.10 | -4.20 | PBDB-T:ITIC    | PBDB-T  | -5.33 | -2.92 | ITIC    | -5.48 | -3.83 | 0.910 | 15.80 | 58.00 | 8.60  | 1 | 201 | 35 | 1.50 | 0.15 | 0.91 |
| PEDOT:PSS    | PFN-2TNDI | -5.10 | -4.00 | PTB7-Th:N2200  | PTB7-Th | -5.20 | -3.59 | N2200   | -5.77 | -3.84 | 0.780 | 13.69 | 58.00 | 6.30  | 0 | 201 | 35 | 1.36 | 0.57 | 0.25 |
| PEDOT:PSS    | Ca        | -5.10 | -2.90 | PTB7-Th:N2200  | PTB7-Th | -5.20 | -3.59 | N2200   | -5.77 | -3.84 | 0.780 | 12.69 | 55.00 | 5.60  | 0 | 201 | 35 | 1.36 | 0.57 | 0.25 |
| PEDOT:PSS    | PFN       | -5.10 | -4.20 | PTB7-Th:N2200  | PTB7-Th | -5.20 | -3.59 | N2200   | -5.77 | -3.84 | 0.770 | 13.18 | 51.00 | 5.40  | 0 | 201 | 35 | 1.36 | 0.57 | 0.25 |
| PEDOT:PSS    | MSAPBS    | -5.10 | -3.01 | PTB7-Th:PC71BM | PTB7-Th | -5.40 | -3.80 | PC71BM  | -6.10 | -4.10 | 0.790 | 18.15 | 59.80 | 8.56  | 0 | 201 | 36 | 0.90 | 1.10 | 1.10 |
| O-MoS2-QDs   | MSAPBS    | -5.20 | -3.01 | PTB7-Th:PC71BM | PTB7-Th | -5.40 | -3.80 | PC71BM  | -6.10 | -4.10 | 0.790 | 16.90 | 65.00 | 8.66  | 0 | 201 | 36 | 0.90 | 1.10 | 1.10 |
| O-MoS2-QDs   | Ca        | -5.20 | -2.90 | PTB7-Th:PC71BM | PTB7-Th | -5.40 | -3.80 | PC71BM  | -6.10 | -4.10 | 0.780 | 16.74 | 59.20 | 7.71  | 0 | 201 | 36 | 0.90 | 1.10 | 1.10 |
| PEDOT:PSS    | Ca        | -5.10 | -2.90 | PTB7-Th:PC71BM | PTB7-Th | -5.40 | -3.80 | PC71BM  | -6.10 | -4.10 | 0.740 | 16.53 | 62.50 | 7.63  | 0 | 201 | 36 | 1.30 | 0.70 | 0.30 |
| MoS2-QDs     | MSAPBS    | -4.40 | -3.01 | PTB7-Th:PC71BM | PTB7-Th | -5.40 | -3.80 | PC71BM  | -6.10 | -4.10 | 0.630 | 14.01 | 57.00 | 5.09  | 0 | 201 | 36 | 1.30 | 0.70 | 0.30 |
| O-MoS2-QDs   | Ca        | -5.20 | -2.90 | P3HT:PC61BM    | P3HT    | -5.00 | -3.00 | PC61BM  | -6.10 | -4.10 | 0.570 | 7.28  | 63.40 | 2.62  | 0 | 201 | 36 | 1.30 | 0.70 | 0.30 |
| PEDOT:PSS    | Ca        | -5.10 | -2.90 | P3HT:PC61BM    | P3HT    | -5.00 | -3.00 | PC61BM  | -6.10 | -4.10 | 0.560 | 8.21  | 59.10 | 2.70  | 0 | 201 | 36 | 1.30 | 0.70 | 0.30 |
| MoS2-QDs     | Ca        | -4.40 | -2.90 | PTB7-Th:PC71BM | PTB7-Th | -5.40 | -3.80 | PC71BM  | -6.10 | -4.10 | 0.550 | 14.58 | 53.10 | 4.23  | 0 | 201 | 36 | 1.30 | 0.70 | 0.30 |
| MoS2-QDs     | Ca        | -4.40 | -2.90 | P3HT:PC61BM    | P3HT    | -5.00 | -3.00 | PC61BM  | -6.10 | -4.10 | 0.320 | 6.08  | 42.30 | 0.81  | 0 | 201 | 36 | 1.30 | 0.70 | 0.30 |
| MoO3         | eLbL      | -5.50 | -4.30 | PTB7-Th:PC71BM | PTB7-Th | -5.40 | -3.80 | PC71BM  | -6.00 | -4.20 | 0.760 | 20.00 | 67.00 | 10.18 | 0 | 201 | 37 | 1.20 | 0.60 | 0.40 |
| PEDOT:PSS    | LiF       | -5.10 | -4.10 | PCDTBT:PC71BM  | PCDTBT  | -5.50 | -3.60 | PC71BM  | -6.10 | -4.30 | 0.900 | 10.11 | 66.00 | 6.02  | 1 | 201 | 38 | 0.85 | 0.95 | 0.99 |
| F-GQD        | LiF       | -5.26 | -4.10 | PCDTBT:PC71BM  | PCDTBT  | -5.50 | -3.60 | PC71BM  | -6.10 | -4.30 | 0.890 | 10.65 | 67.00 | 6.30  | 1 | 201 | 38 | 0.85 | 0.95 | 0.99 |
| F-GQD        | LiF       | -5.26 | -4.10 | PTB7:PC71BM    | PTB7    | -5.15 | -3.31 | PC71BM  | -6.10 | -4.30 | 0.750 | 15.20 | 69.00 | 7.91  | 0 | 201 | 38 | 0.85 | 0.95 | 0.99 |
| PEDOT:PSS    | LiF       | -5.10 | -4.10 | PTB7:PC71BM    | PTB7    | -5.15 | -3.31 | PC71BM  | -6.10 | -4.30 | 0.740 | 13.96 | 72.00 | 7.46  | 0 | 201 | 38 | 1.20 | 0.60 | 0.70 |
| GO           | LiF       | -5.01 | -4.10 | PTB7:PC71BM    | PTB7    | -5.15 | -3.31 | PC71BM  | -6.10 | -4.30 | 0.690 | 13.58 | 68.00 | 6.33  | 0 | 201 | 38 | 1.20 | 0.60 | 0.70 |
| GO           | LiF       | -5.01 | -4.10 | PCDTBT:PC71BM  | PCDTBT  | -5.50 | -3.60 | PC71BM  | -6.10 | -4.30 | 0.670 | 9.97  | 65.00 | 4.34  | 0 | 201 | 38 | 1.20 | 0.60 | 0.70 |
| PEDOT:PSS    | TiOx      | -5.10 | -4.30 | PCDTBT:PC71BM  | PCDTBT  | -5.50 | -3.60 | PC71BM  | -6.00 | -4.30 | 0.880 | 11.28 | 55.60 | 5.61  | 1 | 201 | 39 | 1.20 | 0.50 | 0.70 |
| GO           | TiOx      | -4.95 | -4.30 | PCDTBT:PC71BM  | PCDTBT  | -5.50 | -3.60 | PC71BM  | -6.00 | -4.30 | 0.880 | 11.52 | 55.10 | 5.71  | 1 | 201 | 39 | 1.20 | 0.50 | 0.70 |
| GO-C11       | TiOx      | -5.04 | -4.30 | PCDTBT:PC71BM  | PCDTBT  | -5.50 | -3.60 | PC71BM  | -6.00 | -4.30 | 0.880 | 11.78 | 55.10 | 5.82  | 1 | 201 | 39 | 1.20 | 0.50 | 0.70 |
| GO-C12       | TiOx      | -5.11 | -4.30 | PCDTBT:PC71BM  | PCDTBT  | -5.50 | -3.60 | PC71BM  | -6.00 | -4.30 | 0.880 | 12.19 | 55.20 | 6.07  | 1 | 201 | 39 | 1.20 | 0.50 | 0.70 |
| GO-C13       | TiOx      | -5.16 | -4.30 | PCDTBT:PC71BM  | PCDTBT  | -5.50 | -3.60 | PC71BM  | -6.00 | -4.30 | 0.880 | 13.32 | 55.10 | 6.61  | 1 | 201 | 39 | 1.20 | 0.50 | 0.70 |
| GO-C14       | TiOx      | -5.23 | -4.30 | PCDTBT:PC71BM  | PCDTBT  | -5.50 | -3.60 | PC71BM  | -6.00 | -4.30 | 0.880 | 13.65 | 55.30 | 6.79  | 1 | 201 | 39 | 1.20 | 0.50 | 0.70 |

|                |            |       |       |                |           |       |       |        |       |       |       |       |       |       |   |     |    |      |      |      |
|----------------|------------|-------|-------|----------------|-----------|-------|-------|--------|-------|-------|-------|-------|-------|-------|---|-----|----|------|------|------|
| PEDOT:PSS      | TiOx       | -5.10 | -4.30 | PTB7:PC71BM    | PTB7      | -5.15 | -3.30 | PC71BM | -6.00 | -4.30 | 0.760 | 16.27 | 59.80 | 7.60  | 0 | 201 | 39 | 0.85 | 0.85 | 1.00 |
| GO             | TiOx       | -4.95 | -4.30 | PTB7:PC71BM    | PTB7      | -5.15 | -3.30 | PC71BM | -6.00 | -4.30 | 0.760 | 16.65 | 59.70 | 7.74  | 0 | 201 | 39 | 0.85 | 0.85 | 1.00 |
| GO-C11         | TiOx       | -5.04 | -4.30 | PTB7:PC71BM    | PTB7      | -5.15 | -3.30 | PC71BM | -6.00 | -4.30 | 0.760 | 17.13 | 59.60 | 7.93  | 0 | 201 | 39 | 0.85 | 0.85 | 1.00 |
| GO-C12         | TiOx       | -5.11 | -4.30 | PTB7:PC71BM    | PTB7      | -5.15 | -3.30 | PC71BM | -6.00 | -4.30 | 0.760 | 17.58 | 59.60 | 8.19  | 0 | 201 | 39 | 0.85 | 0.85 | 1.00 |
| GO-C13         | TiOx       | -5.16 | -4.30 | PTB7:PC71BM    | PTB7      | -5.15 | -3.30 | PC71BM | -6.00 | -4.30 | 0.760 | 18.30 | 59.90 | 8.52  | 0 | 201 | 39 | 0.85 | 0.85 | 1.00 |
| GO-C14         | TiOx       | -5.23 | -4.30 | PTB7:PC71BM    | PTB7      | -5.15 | -3.30 | PC71BM | -6.00 | -4.30 | 0.760 | 17.09 | 59.50 | 7.91  | 0 | 201 | 39 | 0.85 | 0.85 | 1.00 |
| MoO3           | ZnO/C-dots | -5.30 | -3.50 | PTB7:PC71BM    | PTB7      | -5.20 | -3.30 | PC71BM | -6.10 | -4.20 | 0.750 | 17.59 | 68.27 | 9.08  | 0 | 201 | 40 | 1.00 | 0.90 | 0.90 |
| MoO3           | AZO/C-dots | -5.30 | -3.39 | PTB7:PC71BM    | PTB7      | -5.20 | -3.30 | PC71BM | -6.10 | -4.20 | 0.750 | 17.65 | 69.50 | 9.28  | 0 | 201 | 40 | 1.00 | 0.90 | 0.90 |
| MoO3           | ZnO        | -5.30 | -3.89 | PTB7:PC71BM    | PTB7      | -5.20 | -3.30 | PC71BM | -6.10 | -4.20 | 0.730 | 15.23 | 67.11 | 7.54  | 0 | 201 | 40 | 1.00 | 0.90 | 0.90 |
| MoO3           | AZO        | -5.30 | -3.80 | PTB7:PC71BM    | PTB7      | -5.20 | -3.30 | PC71BM | -6.10 | -4.20 | 0.730 | 16.19 | 67.43 | 8.06  | 0 | 201 | 40 | 1.00 | 0.90 | 0.90 |
| MoO3           | PFN100     | -5.30 | -3.60 | P3HT:PC61BM    | P3HT      | -5.00 | -3.00 | PC61BM | -6.00 | -4.20 | 0.630 | 7.86  | 66.00 | 3.27  | 0 | 201 | 41 | 0.80 | 1.00 | 1.20 |
| MoO3           | PFN70      | -5.30 | -3.69 | P3HT:PC61BM    | P3HT      | -5.00 | -3.00 | PC61BM | -6.00 | -4.20 | 0.620 | 7.84  | 62.00 | 3.01  | 0 | 201 | 41 | 0.80 | 1.00 | 1.20 |
| MoO3           | PFN50      | -5.30 | -3.73 | P3HT:PC61BM    | P3HT      | -5.00 | -3.00 | PC61BM | -6.00 | -4.20 | 0.610 | 7.51  | 56.10 | 2.57  | 0 | 201 | 41 | 0.80 | 1.00 | 1.20 |
| MoO3           | PFN30      | -5.30 | -3.86 | P3HT:PC61BM    | P3HT      | -5.00 | -3.00 | PC61BM | -6.00 | -4.20 | 0.600 | 7.00  | 54.80 | 2.31  | 0 | 201 | 41 | 0.80 | 1.00 | 1.20 |
| PEDOT:PSS      | PFN-Br     | -4.85 | -2.80 | PBDB-TF:PC71BM | PBDB-TF   | -5.45 | -3.65 | PC71BM | -6.10 | -4.20 | 0.980 | 13.37 | 73.20 | 9.59  | 1 | 201 | 42 | 1.11 | 0.79 | 1.20 |
| NFD:PEDOT:PSS  | PFN-Br     | -5.01 | -2.80 | PBDB-TF:PC71BM | PBDB-TF   | -5.45 | -3.65 | PC71BM | -6.10 | -4.20 | 0.980 | 13.82 | 79.44 | 10.76 | 1 | 201 | 42 | 1.11 | 0.79 | 1.20 |
| PEDOT:PSS      | PFN-Br     | -4.85 | -2.80 | PDCBT:PC71BM   | PDCBT     | -5.31 | -3.00 | PC71BM | -6.10 | -4.20 | 0.830 | 12.20 | 71.20 | 7.21  | 1 | 201 | 42 | 1.11 | 0.79 | 1.20 |
| PSSS:PEDOT:PSS | PFN-Br     | -4.80 | -2.80 | PDCBT:PC71BM   | PDCBT     | -5.31 | -3.00 | PC71BM | -6.10 | -4.20 | 0.830 | 12.44 | 77.21 | 7.97  | 1 | 201 | 42 | 1.25 | 0.65 | 0.55 |
| NFD            | PFN-Br     | -4.41 | -2.80 | PBDB-TF:PC71BM | PBDB-TF   | -5.45 | -3.65 | PC71BM | -6.10 | -4.20 | 0.520 | 13.57 | 46.85 | 3.31  | 0 | 201 | 42 | 1.25 | 0.65 | 0.55 |
| PSSS           | PFN-Br     | -4.32 | -2.80 | PDCBT:PC71BM   | PDCBT     | -5.31 | -3.00 | PC71BM | -6.10 | -4.20 | 0.450 | 12.31 | 42.12 | 2.28  | 0 | 201 | 42 | 1.25 | 0.65 | 0.55 |
| PEDOT:PSS      | ZnO        | -5.13 | -4.20 | P3HT:PCBM      | P3HT      | -5.20 | -3.20 | PCBM   | -6.10 | -3.90 | 0.610 | 8.50  | 59.00 | 2.99  | 0 | 201 | 43 | 1.30 | 0.90 | 0.70 |
| PEDOT:PSS@DOH  | ZnO        | -5.24 | -4.20 | P3HT:PCBM      | P3HT      | -5.20 | -3.20 | PCBM   | -6.10 | -3.90 | 0.600 | 9.13  | 63.00 | 3.44  | 0 | 201 | 43 | 1.30 | 0.90 | 0.70 |
| WOx:PEDOT:PSS  | PFN-Br     | -4.70 | -2.80 | PBDB-TF:IT-4F  | PBDB-TF   | -5.50 | -3.61 | IT-4F  | -5.69 | -4.07 | 0.870 | 20.73 | 80.78 | 14.57 | 1 | 201 | 44 | 1.43 | 0.19 | 0.46 |
| PEDOT:PSS      | PFN-Br     | -4.85 | -2.80 | PBDB-TF:IT-4F  | PBDB-TF   | -5.50 | -3.61 | IT-4F  | -5.69 | -4.07 | 0.870 | 20.68 | 73.87 | 13.29 | 1 | 201 | 44 | 1.43 | 0.19 | 0.46 |
| WOx            | PFN-Br     | -4.73 | -2.80 | PBDB-TF:IT-4F  | PBDB-TF   | -5.50 | -3.61 | IT-4F  | -5.69 | -4.07 | 0.780 | 16.78 | 66.70 | 8.73  | 0 | 201 | 44 | 1.43 | 0.19 | 0.46 |
| MoO3           | ECGQD-K    | -5.50 | -4.33 | PCDTBT:PC71BM  | PCDTBT    | -5.40 | -3.20 | PC71BM | -6.10 | -4.30 | 0.880 | 9.70  | 67.00 | 5.72  | 1 | 201 | 45 | 1.10 | 0.70 | 1.10 |
| MoO3           | ECGQD-Rb   | -5.50 | -4.16 | PCDTBT:PC71BM  | PCDTBT    | -5.40 | -3.20 | PC71BM | -6.10 | -4.30 | 0.880 | 9.77  | 68.00 | 5.85  | 1 | 201 | 45 | 1.10 | 0.70 | 1.10 |
| MoO3           | ECGQD-Cs   | -5.50 | -4.03 | PCDTBT:PC71BM  | PCDTBT    | -5.40 | -3.20 | PC71BM | -6.10 | -4.30 | 0.880 | 9.92  | 68.00 | 5.94  | 1 | 201 | 45 | 1.10 | 0.70 | 1.10 |
| MoO3           | ECGQD-Na   | -5.50 | -4.41 | PCDTBT:PC71BM  | PCDTBT    | -5.40 | -3.20 | PC71BM | -6.10 | -4.30 | 0.730 | 9.54  | 55.00 | 3.83  | 0 | 201 | 45 | 1.10 | 0.70 | 1.10 |
| MoO3           | ECGQD-Li   | -5.50 | -4.47 | PCDTBT:PC71BM  | PCDTBT    | -5.40 | -3.20 | PC71BM | -6.10 | -4.30 | 0.590 | 9.57  | 49.00 | 2.77  | 0 | 201 | 45 | 1.10 | 0.70 | 1.10 |
| PEDOT:PSS      | ZnO        | -5.14 | -4.30 | PTB7-Th:PC71BM | PTB7-Th   | -5.24 | -3.60 | PC71BM | -5.90 | -3.90 | 0.854 | 26.50 | 73.50 | 16.60 | 1 | 202 | 46 | 1.34 | 0.66 | 0.30 |
| an-MoOx2       | ZnO        | -5.14 | -4.30 | PTB7-Th:PC71BM | PTB7-Th   | -5.24 | -3.60 | PC71BM | -5.90 | -3.90 | 0.845 | 27.43 | 73.80 | 17.10 | 1 | 202 | 46 | 1.34 | 0.66 | 0.30 |
| aq-MoOx        | ZnO        | -4.92 | -4.30 | PTB7-Th:PC71BM | PTB7-Th   | -5.24 | -3.60 | PC71BM | -5.90 | -3.90 | 0.843 | 27.53 | 73.10 | 17.00 | 1 | 202 | 46 | 1.34 | 0.66 | 0.30 |
| an-MoOx1       | ZnO        | -4.74 | -4.30 | PTB7-Th:PC71BM | PTB7-Th   | -5.24 | -3.60 | PC71BM | -5.90 | -3.90 | 0.826 | 20.50 | 45.20 | 7.70  | 1 | 202 | 46 | 1.34 | 0.66 | 0.30 |
| PEDOT:PSS      | ZnO        | -5.14 | -4.30 | PBDB-T-2F:Y6   | PBDB-T-2F | -5.60 | -3.50 | Y6     | -5.70 | -4.10 | 0.791 | 15.67 | 67.30 | 8.30  | 0 | 202 | 46 | 1.50 | 0.10 | 0.60 |
| an-MoOxw       | ZnO        | -5.14 | -4.30 | PBDB-T-2F:Y6   | PBDB-T-2F | -5.60 | -3.50 | Y6     | -5.70 | -4.10 | 0.791 | 16.60 | 68.20 | 9.00  | 0 | 202 | 46 | 1.50 | 0.10 | 0.60 |
| aq-MoOx        | ZnO        | -4.92 | -4.30 | PBDB-T-2F:Y6   | PBDB-T-2F | -5.60 | -3.50 | Y6     | -5.70 | -4.10 | 0.790 | 16.69 | 67.10 | 8.90  | 0 | 202 | 46 | 1.50 | 0.10 | 0.60 |
| an-MoOxo       | ZnO        | -4.74 | -4.30 | PBDB-T-2F:Y6   | PBDB-T-2F | -5.60 | -3.50 | Y6     | -5.70 | -4.10 | 0.683 | 4.25  | 47.90 | 1.40  | 0 | 202 | 46 | 1.50 | 0.10 | 0.60 |

|                  |            |       |       |                  |           |       |       |          |       |       |       |       |       |       |   |     |    |      |      |      |
|------------------|------------|-------|-------|------------------|-----------|-------|-------|----------|-------|-------|-------|-------|-------|-------|---|-----|----|------|------|------|
| MoOx             | ZnO        | -5.40 | -4.40 | PBDB-T:ITIC      | PBDB-T    | -5.33 | -2.92 | ITIC     | -5.51 | -3.78 | 0.890 | 16.61 | 67.71 | 10.01 | 1 | 202 | 47 | 1.55 | 0.18 | 0.86 |
| F6-TCNNQ         | ZnO        | -5.60 | -4.40 | PBDB-T:ITIC      | PBDB-T    | -5.33 | -2.92 | ITIC     | -5.51 | -3.78 | 0.870 | 17.01 | 67.34 | 9.97  | 1 | 202 | 47 | 1.55 | 0.18 | 0.86 |
| PEDOT:PSS:TS     | PFN-Br     | -5.18 | -2.62 | PTB7-Th:IEICO-4F | PTB7-Th   | -5.22 | -3.59 | IEICO-4F | -5.44 | -4.19 | 0.720 | 21.09 | 58.00 | 8.84  | 0 | 202 | 48 | 1.03 | 0.22 | 0.60 |
| F4-TCNQ:TS       | PFN-Br     | -5.06 | -2.62 | PTB7-Th:IEICO-4F | PTB7-Th   | -5.22 | -3.59 | IEICO-4F | -5.44 | -4.19 | 0.720 | 24.36 | 54.67 | 9.59  | 0 | 202 | 48 | 1.03 | 0.22 | 0.60 |
| N719:TS          | PFN-Br     | -5.21 | -2.62 | PTB7-Th:IEICO-4F | PTB7-Th   | -5.22 | -3.59 | IEICO-4F | -5.44 | -4.19 | 0.720 | 20.81 | 58.19 | 8.72  | 0 | 202 | 48 | 1.03 | 0.22 | 0.60 |
| Ti3C2Tx          | PFN-Br     | -5.00 | -3.90 | PBDB-T:ITIC      | PBDB-T    | -5.52 | -3.68 | ITIC     | -5.70 | -4.00 | 0.910 | 17.08 | 70.93 | 11.02 | 1 | 202 | 49 | 1.52 | 0.18 | 0.32 |
| PEDOT:PSS        | PFN-Br     | -5.10 | -3.90 | PBDB-T:ITIC      | PBDB-T    | -5.52 | -3.68 | ITIC     | -5.70 | -4.00 | 0.900 | 16.17 | 66.76 | 9.72  | 1 | 202 | 49 | 1.52 | 0.18 | 0.32 |
| PEDOT:PSS        | PFN-Br     | -5.10 | -3.90 | PM6:Y6           | PM6       | -5.56 | -3.50 | Y6       | -5.65 | -4.10 | 0.830 | 24.22 | 65.16 | 13.10 | 1 | 202 | 49 | 1.46 | 0.09 | 0.60 |
| Ti3C2Tx          | PFN-Br     | -5.00 | -3.90 | PM6:Y6           | PM6       | -5.56 | -3.50 | Y6       | -5.65 | -4.10 | 0.830 | 25.63 | 68.40 | 14.55 | 1 | 202 | 49 | 1.46 | 0.09 | 0.60 |
| GO/PEDOT:PSS     | ZnO        | -4.95 | -4.20 | P3HT:PCBM        | P3HT      | -5.10 | -3.20 | PCBM     | -6.60 | -4.20 | 0.490 | 15.42 | 64.00 | 4.82  | 0 | 201 | 50 | 0.90 | 1.50 | 1.00 |
| PEDOT:PSS        | ZnO        | -5.00 | -4.20 | P3HT:PCBM        | P3HT      | -5.10 | -3.20 | PCBM     | -6.60 | -4.20 | 0.460 | 13.38 | 63.00 | 4.00  | 0 | 201 | 50 | 0.90 | 1.50 | 1.00 |
| GO               | ZnO        | -4.90 | -4.20 | P3HT:PCBM        | P3HT      | -5.10 | -3.20 | PCBM     | -6.60 | -4.20 | 0.450 | 11.18 | 62.00 | 3.16  | 0 | 201 | 50 | 0.90 | 1.50 | 1.00 |
| PEDOT:PSS        | Ca         | -5.00 | -2.87 | PBDB-T:IT-M      | PBDB-T    | -5.21 | -3.41 | IT-M     | -5.58 | -3.98 | 0.924 | 15.60 | 70.50 | 10.40 | 1 | 201 | 51 | 1.23 | 0.37 | 0.57 |
| MoO3             | TiO2       | -5.17 | -4.14 | PBDB-T:IT-M      | PBDB-T    | -5.21 | -3.41 | IT-M     | -5.58 | -3.98 | 0.923 | 16.70 | 70.10 | 11.20 | 1 | 201 | 51 | 1.23 | 0.37 | 0.57 |
| PEDOT:PSS        | PFN        | -5.00 | -3.85 | PTB7:PC71BM      | PTB7      | -5.20 | -3.30 | PC71BM   | -6.10 | -3.90 | 0.770 | 15.09 | 62.30 | 7.29  | 0 | 201 | 52 | 1.30 | 0.90 | 0.60 |
| F5-rGO           | PFN        | -5.10 | -3.85 | PTB7:PC71BM      | PTB7      | -5.20 | -3.30 | PC71BM   | -6.10 | -3.90 | 0.680 | 14.78 | 57.30 | 5.82  | 0 | 201 | 52 | 1.30 | 0.90 | 0.60 |
| GMO2             | TiO2       | -4.70 | -4.40 | PTB7-Th:PC71BM   | PTB7-Th   | -5.20 | -3.60 | PC71BM   | -6.10 | -4.30 | 0.800 | 17.10 | 67.70 | 9.50  | 1 | 201 | 53 | 0.90 | 0.90 | 0.70 |
| GMO1             | TiO2       | -4.60 | -4.40 | PTB7-Th:PC71BM   | PTB7-Th   | -5.20 | -3.60 | PC71BM   | -6.10 | -4.30 | 0.780 | 17.80 | 64.40 | 9.10  | 0 | 201 | 53 | 0.90 | 0.90 | 0.70 |
| PEDOT:PSS        | Ca         | -5.10 | -2.90 | PTB7-Th:PC71BM   | PTB7-Th   | -5.20 | -3.60 | PC71BM   | -6.10 | -4.30 | 0.770 | 16.70 | 67.80 | 9.00  | 0 | 201 | 53 | 0.90 | 0.90 | 0.70 |
| GMO2             | Ca         | -4.70 | -2.90 | PTB7-Th:PC71BM   | PTB7-Th   | -5.20 | -3.60 | PC71BM   | -6.10 | -4.30 | 0.760 | 16.10 | 65.60 | 8.10  | 0 | 201 | 53 | 0.90 | 0.90 | 0.70 |
| GMO3             | TiO2       | -5.00 | -4.40 | PTB7-Th:PC71BM   | PTB7-Th   | -5.20 | -3.60 | PC71BM   | -6.10 | -4.30 | 0.760 | 18.90 | 58.90 | 8.80  | 0 | 201 | 53 | 0.90 | 0.90 | 0.70 |
| GMO1             | Ca         | -4.60 | -2.90 | PTB7-Th:PC71BM   | PTB7-Th   | -5.20 | -3.60 | PC71BM   | -6.10 | -4.30 | 0.740 | 15.70 | 64.80 | 7.70  | 0 | 201 | 53 | 0.90 | 0.90 | 0.70 |
| GMO3             | Ca         | -5.00 | -2.90 | PTB7-Th:PC71BM   | PTB7-Th   | -5.20 | -3.60 | PC71BM   | -6.10 | -4.30 | 0.740 | 16.00 | 63.50 | 7.40  | 0 | 201 | 53 | 0.90 | 0.90 | 0.70 |
| PEDOT:PSS        | PFN-Br     | -5.06 | -2.70 | PM6:Y6           | PM6       | -5.50 | -3.61 | Y6       | -5.68 | -4.06 | 0.830 | 26.10 | 70.00 | 15.18 | 1 | 202 | 54 | 1.44 | 0.18 | 0.45 |
| PEDOT:PSS:TEMPO+ | PFN-Br     | -5.03 | -2.70 | PM6:Y6           | PM6       | -5.50 | -3.61 | Y6       | -5.68 | -4.06 | 0.830 | 28.22 | 67.72 | 15.78 | 1 | 202 | 54 | 1.44 | 0.18 | 0.45 |
| PEDOT:PSS:TEMPO+ | PFN-Br     | -5.18 | -2.70 | PM6:Y6           | PM6       | -5.50 | -3.61 | Y6       | -5.68 | -4.06 | 0.830 | 26.98 | 69.99 | 15.60 | 1 | 202 | 54 | 1.44 | 0.18 | 0.45 |
| PEDOT:PSS:TEMPO+ | PFN-Br     | -5.24 | -2.70 | PM6:Y6           | PM6       | -5.50 | -3.61 | Y6       | -5.68 | -4.06 | 0.820 | 26.69 | 65.62 | 14.26 | 1 | 202 | 54 | 1.44 | 0.18 | 0.45 |
| PEDOT:PSS:TEMPO+ | PFN-Br     | -4.96 | -2.70 | PM6:Y6           | PM6       | -5.50 | -3.61 | Y6       | -5.68 | -4.06 | 0.810 | 27.35 | 71.31 | 15.90 | 1 | 202 | 54 | 1.44 | 0.18 | 0.45 |
| PMC-4            | PFN-Br     | -5.40 | -2.90 | PBDB-T:ITIC      | PBDB-T    | -5.33 | -2.92 | ITIC     | -5.51 | -3.78 | 0.900 | 16.80 | 71.00 | 10.70 | 1 | 202 | 55 | 1.21 | 0.34 | 0.68 |
| PMC-1            | PFN-Br     | -5.35 | -2.90 | PBDB-T-2F:Y6     | PBDB-T-2F | -5.31 | -3.42 | Y6       | -5.65 | -4.10 | 0.855 | 25.50 | 73.60 | 16.04 | 1 | 202 | 55 | 1.21 | 0.34 | 0.68 |
| PMC-4            | PFN-Br     | -5.42 | -2.90 | PBDB-T-2F:Y6     | PBDB-T-2F | -5.31 | -3.42 | Y6       | -5.65 | -4.10 | 0.853 | 25.48 | 75.10 | 16.34 | 1 | 202 | 55 | 1.21 | 0.34 | 0.68 |
| PMC-2            | PFN-Br     | -5.40 | -2.90 | PBDB-T-2F:Y6     | PBDB-T-2F | -5.31 | -3.42 | Y6       | -5.65 | -4.10 | 0.852 | 25.26 | 74.80 | 16.09 | 1 | 202 | 55 | 1.21 | 0.34 | 0.68 |
| PMC-3            | PFN-Br     | -5.41 | -2.90 | PBDB-T-2F:Y6     | PBDB-T-2F | -5.31 | -3.42 | Y6       | -5.65 | -4.10 | 0.850 | 25.42 | 74.50 | 16.11 | 1 | 202 | 55 | 1.21 | 0.34 | 0.68 |
| PMC-5            | PFN-Br     | -5.50 | -2.90 | PBDB-T-2F:Y6     | PBDB-T-2F | -5.31 | -3.42 | Y6       | -5.65 | -4.10 | 0.842 | 25.16 | 74.50 | 15.79 | 1 | 202 | 55 | 1.21 | 0.34 | 0.68 |
| PMC-4            | PFN-Br     | -5.40 | -2.90 | PBDB-T-2F:IT-4F  | PBDB-T-2F | -5.31 | -3.42 | IT-4F    | -5.65 | -4.12 | 0.840 | 21.10 | 75.00 | 13.20 | 1 | 202 | 55 | 1.55 | 0.18 | 0.86 |
| PEDOT:PSS        | PFN-Br     | -4.90 | -2.90 | PBDB-T-2F:Y6     | PBDB-T-2F | -5.31 | -3.42 | Y6       | -5.65 | -4.10 | 0.830 | 25.30 | 74.80 | 15.70 | 1 | 202 | 55 | 1.19 | 0.34 | 0.70 |
| MoOx             | ZnO/Py-DBP | -6.00 | -3.70 | PM6:IT-4F        | PM6       | -5.50 | -3.60 | IT-4F    | -5.86 | -4.14 | 0.820 | 19.98 | 72.00 | 11.80 | 1 | 202 | 56 | 1.30 | 0.60 | 0.30 |
| MoOx             | ZnO        | -6.00 | -4.00 | PM6:IT-4F        | PM6       | -5.50 | -3.60 | IT-4F    | -5.86 | -4.14 | 0.800 | 19.14 | 68.00 | 10.41 | 1 | 202 | 56 | 1.30 | 0.60 | 0.30 |

|           |             |       |       |                    |            |       |       |         |       |       |       |       |       |       |   |     |    |      |      |      |
|-----------|-------------|-------|-------|--------------------|------------|-------|-------|---------|-------|-------|-------|-------|-------|-------|---|-----|----|------|------|------|
| MoOx      | ZnO/Py-DBP  | -6.00 | -3.70 | PTB7-Th:PC71BM     | PTB7-Th    | -5.20 | -3.60 | PC71BM  | -5.80 | -3.90 | 0.790 | 17.83 | 70.00 | 9.86  | 0 | 202 | 56 | 1.36 | 0.36 | 0.54 |
| MoOx      | ZnO         | -6.00 | -4.00 | PTB7-Th:PC71BM     | PTB7-Th    | -5.20 | -3.60 | PC71BM  | -5.80 | -3.90 | 0.750 | 16.19 | 69.00 | 8.38  | 0 | 202 | 56 | 1.36 | 0.36 | 0.54 |
| PEDOT:PSS | BCP         | -5.10 | -3.55 | PTB7-Th:PC71BM     | PTB7-Th    | -5.20 | -3.60 | PC71BM  | -6.10 | -4.20 | 0.815 | 15.97 | 65.16 | 8.48  | 1 | 201 | 57 | 1.00 | 0.90 | 0.60 |
| PEDOT:PSS | PDIN/BCP    | -5.10 | -3.86 | PTB7-Th:PC71BM     | PTB7-Th    | -5.20 | -3.60 | PC71BM  | -6.10 | -4.20 | 0.815 | 17.62 | 70.07 | 10.05 | 1 | 201 | 57 | 1.00 | 0.90 | 0.60 |
| PEDOT:PSS | PDIN        | -5.10 | -3.92 | PTB7-Th:PC71BM     | PTB7-Th    | -5.20 | -3.60 | PC71BM  | -6.10 | -4.20 | 0.814 | 16.50 | 65.58 | 8.82  | 1 | 201 | 57 | 1.00 | 0.90 | 0.60 |
| PEDOT:PSS | PFN/BCP     | -5.10 | -3.86 | PTB7-Th:PC71BM     | PTB7-Th    | -5.20 | -3.60 | PC71BM  | -6.10 | -4.20 | 0.814 | 17.84 | 69.55 | 10.11 | 1 | 201 | 57 | 1.00 | 0.90 | 0.60 |
| PEDOT:PSS | ZrAcac/BCP  | -5.10 | -3.76 | PTB7-Th:PC71BM     | PTB7-Th    | -5.20 | -3.60 | PC71BM  | -6.10 | -4.20 | 0.814 | 16.91 | 70.23 | 9.66  | 1 | 201 | 57 | 1.00 | 0.90 | 0.60 |
| PEDOT:PSS | ZrAcac      | -5.10 | -4.41 | PTB7-Th:PC71BM     | PTB7-Th    | -5.20 | -3.60 | PC71BM  | -6.10 | -4.20 | 0.730 | 15.12 | 60.25 | 6.65  | 0 | 201 | 57 | 1.00 | 0.90 | 0.60 |
| PEDOT:PSS | PFN         | -5.10 | -4.36 | PTB7-Th:PC71BM     | PTB7-Th    | -5.20 | -3.60 | PC71BM  | -6.10 | -4.20 | 0.550 | 15.85 | 52.27 | 4.55  | 0 | 201 | 57 | 1.00 | 0.90 | 0.60 |
| V2O5      | ZnO         | -4.70 | -4.40 | PffBT2T-TT:O-IDTBR | PffBT2T-TT | -5.42 | -3.52 | O-IDTBR | -5.51 | -3.55 | 1.080 | 14.73 | 64.00 | 10.10 | 1 | 201 | 58 | 1.87 | 0.09 | 0.03 |
| V2O5      | ZnO         | -4.70 | -4.40 | PffBT2T-TT:PC71BM  | PffBT2T-TT | -5.42 | -3.52 | PC71BM  | -6.10 | -4.20 | 0.800 | 17.71 | 69.00 | 9.80  | 1 | 201 | 58 | 1.22 | 0.68 | 0.68 |
| MoO3      | ZMO         | -5.30 | -4.24 | PTB7-Th:PC71BM     | PTB7-Th    | -5.22 | -3.64 | PC71BM  | -6.10 | -4.20 | 0.800 | 18.40 | 63.52 | 9.39  | 1 | 201 | 59 | 1.02 | 0.88 | 0.56 |
| PEDOT:PSS | PHF-N       | -5.10 | -3.94 | PTB7-Th:PC71BM     | PTB7-Th    | -5.20 | -3.60 | PC71BM  | -6.10 | -4.20 | 0.790 | 16.16 | 70.43 | 8.99  | 0 | 201 | 60 | 1.00 | 0.90 | 0.60 |
| PEDOT:PSS | PHF-BIm4    | -5.10 | -4.01 | PTB7-Th:PC71BM     | PTB7-Th    | -5.20 | -3.60 | PC71BM  | -6.10 | -4.20 | 0.790 | 16.22 | 71.01 | 9.12  | 0 | 201 | 60 | 1.00 | 0.90 | 0.60 |
| PEDOT:PSS | PCF-Cl      | -5.10 | -4.21 | PTB7-Th:PC71BM     | PTB7-Th    | -5.20 | -3.60 | PC71BM  | -6.10 | -4.20 | 0.790 | 16.31 | 68.41 | 8.77  | 0 | 201 | 60 | 1.00 | 0.90 | 0.60 |
| PEDOT:PSS | PHF-OH      | -5.10 | -4.05 | PTB7-Th:PC71BM     | PTB7-Th    | -5.20 | -3.60 | PC71BM  | -6.10 | -4.20 | 0.780 | 16.96 | 73.42 | 9.66  | 0 | 201 | 60 | 1.00 | 0.90 | 0.60 |
| PEDOT:PSS | PHF-F       | -5.10 | -4.05 | PTB7-Th:PC71BM     | PTB7-Th    | -5.20 | -3.60 | PC71BM  | -6.10 | -4.20 | 0.780 | 17.10 | 71.16 | 9.46  | 0 | 201 | 60 | 1.00 | 0.90 | 0.60 |
| PEDOT:PSS | PCF-N       | -5.10 | -4.15 | PTB7-Th:PC71BM     | PTB7-Th    | -5.20 | -3.60 | PC71BM  | -6.10 | -4.20 | 0.780 | 15.98 | 66.48 | 8.32  | 0 | 201 | 60 | 1.00 | 0.90 | 0.60 |
| PEDOT:PSS | PCF-BIm4    | -5.10 | -4.21 | PTB7-Th:PC71BM     | PTB7-Th    | -5.20 | -3.60 | PC71BM  | -6.10 | -4.20 | 0.780 | 16.10 | 67.67 | 8.57  | 0 | 201 | 60 | 1.00 | 0.90 | 0.60 |
| PEDOT:PSS | POF-N       | -5.10 | -3.82 | PTB7-Th:PC71BM     | PTB7-Th    | -5.20 | -3.60 | PC71BM  | -6.10 | -4.20 | 0.780 | 16.07 | 67.84 | 8.52  | 0 | 201 | 60 | 1.00 | 0.90 | 0.60 |
| PEDOT:PSS | POF-OH      | -5.10 | -3.86 | PTB7-Th:PC71BM     | PTB7-Th    | -5.20 | -3.60 | PC71BM  | -6.10 | -4.20 | 0.780 | 17.35 | 73.74 | 9.94  | 0 | 201 | 60 | 1.00 | 0.90 | 0.60 |
| PEDOT:PSS | POF-F       | -5.10 | -3.85 | PTB7-Th:PC71BM     | PTB7-Th    | -5.20 | -3.60 | PC71BM  | -6.10 | -4.20 | 0.780 | 16.77 | 71.52 | 9.34  | 0 | 201 | 60 | 1.00 | 0.90 | 0.60 |
| PEDOT:PSS | PCF-OH      | -5.10 | -4.22 | PTB7-Th:PC71BM     | PTB7-Th    | -5.20 | -3.60 | PC71BM  | -6.10 | -4.20 | 0.770 | 15.95 | 70.17 | 8.61  | 0 | 201 | 60 | 1.00 | 0.90 | 0.60 |
| PEDOT:PSS | PCF-F       | -5.10 | -4.22 | PTB7-Th:PC71BM     | PTB7-Th    | -5.20 | -3.60 | PC71BM  | -6.10 | -4.20 | 0.770 | 17.04 | 71.83 | 9.43  | 0 | 201 | 60 | 1.00 | 0.90 | 0.60 |
| PEDOT:PSS | POF-Cl      | -5.10 | -3.84 | PTB7-Th:PC71BM     | PTB7-Th    | -5.20 | -3.60 | PC71BM  | -6.10 | -4.20 | 0.770 | 17.12 | 71.60 | 9.42  | 0 | 201 | 60 | 1.00 | 0.90 | 0.60 |
| PEDOT:PSS | POF-BIm4    | -5.10 | -3.85 | PTB7-Th:PC71BM     | PTB7-Th    | -5.20 | -3.60 | PC71BM  | -6.10 | -4.20 | 0.770 | 16.59 | 71.22 | 9.10  | 0 | 201 | 60 | 1.00 | 0.90 | 0.60 |
| PEDOT:PSS | PHF-Cl      | -5.10 | -4.00 | PTB7-Th:PC71BM     | PTB7-Th    | -5.20 | -3.60 | PC71BM  | -6.10 | -4.20 | 0.750 | 17.07 | 66.07 | 8.49  | 0 | 201 | 60 | 1.00 | 0.90 | 0.60 |
| MoO3      | ZnO-PFN     | -5.30 | -4.26 | PTB7:PC71BM        | PTB7       | -5.22 | -3.64 | PC71BM  | -5.80 | -4.00 | 0.737 | 18.30 | 67.80 | 9.20  | 0 | 201 | 61 | 1.22 | 0.58 | 0.36 |
| MoO3      | ZnO         | -5.30 | -3.86 | PTB7:PC71BM        | PTB7       | -5.22 | -3.64 | PC71BM  | -5.80 | -4.00 | 0.717 | 16.30 | 61.70 | 7.20  | 0 | 201 | 61 | 1.22 | 0.58 | 0.36 |
| MoO3      | Ru-TiO2     | -5.40 | -3.92 | PTB7:PC71BM        | PTB7       | -5.15 | -3.31 | PC71BM  | -6.10 | -3.90 | 0.710 | 14.64 | 66.69 | 6.93  | 0 | 201 | 62 | 1.25 | 0.95 | 0.59 |
| MoO3      | An-TiO2     | -5.40 | -3.87 | PTB7:PC71BM        | PTB7       | -5.15 | -3.31 | PC71BM  | -6.10 | -3.90 | 0.710 | 15.66 | 70.63 | 7.85  | 0 | 201 | 62 | 1.25 | 0.95 | 0.59 |
| MoO3      | Am-TiO2     | -5.40 | -4.33 | PTB7:PC71BM        | PTB7       | -5.15 | -3.31 | PC71BM  | -6.10 | -3.90 | 0.690 | 13.92 | 63.57 | 6.11  | 0 | 201 | 62 | 1.25 | 0.95 | 0.59 |
| MoOx      | ZnO:Ba(OH)2 | -5.49 | -3.94 | PTB7-Th:PC70BM     | PTB7-Th    | -5.22 | -3.64 | PC70BM  | -6.10 | -4.30 | 0.818 | 15.69 | 67.60 | 8.66  | 1 | 201 | 63 | 0.92 | 0.88 | 0.66 |
| MoOx      | ZnO/Ba(OH)2 | -5.49 | -4.23 | PTB7-Th:PC70BM     | PTB7-Th    | -5.22 | -3.64 | PC70BM  | -6.10 | -4.30 | 0.814 | 15.34 | 68.20 | 8.54  | 1 | 201 | 63 | 0.92 | 0.88 | 0.66 |
| MoOx      | ZnO         | -5.49 | -4.36 | PTB7-Th:PC70BM     | PTB7-Th    | -5.22 | -3.64 | PC70BM  | -6.10 | -4.30 | 0.803 | 14.28 | 62.30 | 7.12  | 1 | 201 | 63 | 0.92 | 0.88 | 0.66 |
| MoO3      | ZnO:PFN-Br  | -6.00 | -4.11 | PBDB-TF:IT-4F      | PBDB-TF    | -5.50 | -3.61 | IT-4F   | -5.69 | -4.07 | 0.870 | 20.16 | 78.79 | 13.82 | 1 | 201 | 64 | 1.43 | 0.19 | 0.46 |
| MoO3      | ZnO         | -6.00 | -4.11 | PBDB-TF:IT-4F      | PBDB-TF    | -5.50 | -3.61 | IT-4F   | -5.69 | -4.07 | 0.850 | 20.13 | 73.42 | 12.56 | 1 | 201 | 64 | 1.43 | 0.19 | 0.46 |
| MoO3      | PFN-Br      | -6.00 | -4.17 | PBDB-TF:IT-4F      | PBDB-TF    | -5.50 | -3.61 | IT-4F   | -5.69 | -4.07 | 0.720 | 17.05 | 40.73 | 5.00  | 0 | 201 | 64 | 1.43 | 0.19 | 0.46 |

|           |              |       |       |                 |           |       |       |        |       |       |       |       |       |       |   |     |    |      |      |      |
|-----------|--------------|-------|-------|-----------------|-----------|-------|-------|--------|-------|-------|-------|-------|-------|-------|---|-----|----|------|------|------|
| MoOx      | ZnO:LiF      | -5.30 | -3.96 | P3HT:PC61BM     | P3HT      | -5.00 | -3.10 | PC61BM | -6.10 | -3.90 | 0.630 | 10.38 | 61.80 | 4.06  | 0 | 201 | 65 | 1.10 | 1.10 | 0.80 |
| MoOx      | ZnO          | -5.30 | -4.10 | P3HT:PC61BM     | P3HT      | -5.00 | -3.10 | PC61BM | -6.10 | -3.90 | 0.620 | 9.03  | 59.70 | 3.35  | 0 | 201 | 65 | 1.10 | 1.10 | 0.80 |
| MoOx      | ZnO:LiCl     | -5.30 | -4.06 | P3HT:PC61BM     | P3HT      | -5.00 | -3.10 | PC61BM | -6.10 | -3.90 | 0.620 | 9.08  | 64.00 | 3.62  | 0 | 201 | 65 | 1.10 | 1.10 | 0.80 |
| MoOx      | ZnO:LiBr     | -5.30 | -4.08 | P3HT:PC61BM     | P3HT      | -5.00 | -3.10 | PC61BM | -6.10 | -3.90 | 0.610 | 10.47 | 59.80 | 3.85  | 0 | 201 | 65 | 1.10 | 1.10 | 0.80 |
| PEDOT:PSS | PBTA-FN      | -5.20 | -3.55 | PBDB-T-2F:IT-4F | PBDB-T-2F | -5.47 | -3.67 | IT-4F  | -5.69 | -4.07 | 0.880 | 19.05 | 72.65 | 12.18 | 1 | 201 | 66 | 1.40 | 0.22 | 0.40 |
| PEDOT:PSS | PFN          | -5.20 | -3.69 | PBDB-T-2F:IT-4F | PBDB-T-2F | -5.47 | -3.67 | IT-4F  | -5.69 | -4.07 | 0.860 | 18.15 | 70.54 | 11.03 | 1 | 201 | 66 | 1.40 | 0.22 | 0.40 |
| MoO3      | SnO2/2Cs2CO3 | -5.30 | -4.05 | P3HT:PC60BM     | P3HT      | -5.20 | -3.30 | PC60BM | -6.10 | -3.70 | 0.590 | 10.29 | 57.62 | 3.50  | 0 | 201 | 67 | 1.50 | 0.90 | 0.40 |
| MoO3      | SnO2/1Cs2CO3 | -5.30 | -4.16 | P3HT:PC60BM     | P3HT      | -5.20 | -3.30 | PC60BM | -6.10 | -3.70 | 0.580 | 10.58 | 59.91 | 3.69  | 0 | 201 | 67 | 1.50 | 0.90 | 0.40 |
| MoO3      | SnO2/3Cs2CO3 | -5.30 | -3.92 | P3HT:PC60BM     | P3HT      | -5.20 | -3.30 | PC60BM | -6.10 | -3.70 | 0.580 | 8.18  | 47.34 | 2.24  | 0 | 201 | 67 | 1.50 | 0.90 | 0.40 |
| MoO3      | SnO2         | -5.30 | -4.34 | P3HT:PC60BM     | P3HT      | -5.20 | -3.30 | PC60BM | -6.10 | -3.70 | 0.550 | 10.16 | 47.83 | 2.68  | 0 | 201 | 67 | 1.50 | 0.90 | 0.40 |
| MoO3      | ZnO          | -5.30 | -4.11 | PTB7-Th:PC71BM  | PTB7-Th   | -5.22 | -3.64 | PC71BM | -5.87 | -3.91 | 0.790 | 16.88 | 68.00 | 9.07  | 0 | 201 | 68 | 1.31 | 0.65 | 0.27 |
| MoO3      | ZnO:PEI      | -5.30 | -4.04 | PTB7-Th:PC71BM  | PTB7-Th   | -5.22 | -3.64 | PC71BM | -5.87 | -3.91 | 0.790 | 16.87 | 68.00 | 9.06  | 0 | 201 | 68 | 1.31 | 0.65 | 0.27 |
| MoO3      | Bilayer      | -5.60 | -4.04 | PBDB-T:ITIC     | PBDB-T    | -5.33 | -2.92 | ITIC   | -5.96 | -3.98 | 0.936 | 19.42 | 65.30 | 11.87 | 1 | 201 | 69 | 1.35 | 0.63 | 1.06 |
| MoO3      | ZnO-NP       | -5.60 | -4.04 | PBDB-T:ITIC     | PBDB-T    | -5.33 | -2.92 | ITIC   | -5.96 | -3.98 | 0.932 | 17.97 | 66.20 | 11.10 | 1 | 201 | 69 | 1.35 | 0.63 | 1.06 |
| MoO3      | DZO          | -5.60 | -4.08 | PBDB-T:ITIC     | PBDB-T    | -5.33 | -2.92 | ITIC   | -5.96 | -3.98 | 0.925 | 18.87 | 63.30 | 11.06 | 1 | 201 | 69 | 1.35 | 0.63 | 1.06 |
| MoO3      | ZnO          | -5.60 | -4.16 | PBDB-T:ITIC     | PBDB-T    | -5.33 | -2.92 | ITIC   | -5.96 | -3.98 | 0.924 | 18.64 | 61.10 | 10.53 | 1 | 201 | 69 | 1.35 | 0.63 | 1.06 |
| MoOx      | TiO2/B2-W    | -6.00 | -4.00 | P3HT:IC60BA     | P3HT      | -5.10 | -3.30 | IC60BA | -5.70 | -3.70 | 0.810 | 10.60 | 70.00 | 6.01  | 1 | 201 | 70 | 1.40 | 0.60 | 0.40 |
| MoOx      | TiO2/B1-Mo   | -6.00 | -3.80 | P3HT:IC60BA     | P3HT      | -5.10 | -3.30 | IC60BA | -5.70 | -3.70 | 0.810 | 10.80 | 71.00 | 6.21  | 1 | 201 | 70 | 1.40 | 0.60 | 0.40 |
| MoOx      | TiO2/B1-W    | -6.00 | -4.20 | P3HT:IC60BA     | P3HT      | -5.10 | -3.30 | IC60BA | -5.70 | -3.70 | 0.800 | 10.40 | 69.00 | 5.74  | 1 | 201 | 70 | 1.40 | 0.60 | 0.40 |
| MoOx      | TiO2         | -6.00 | -4.50 | P3HT:IC60BA     | P3HT      | -5.10 | -3.30 | IC60BA | -5.70 | -3.70 | 0.770 | 9.90  | 65.00 | 4.95  | 0 | 201 | 70 | 1.40 | 0.60 | 0.40 |
| MoOx      | TiO2/B2-W    | -6.00 | -4.00 | PTB7:PC70BM     | PTB7      | -5.20 | -3.20 | PC70BM | -5.90 | -3.90 | 0.750 | 15.40 | 68.00 | 7.85  | 0 | 201 | 70 | 1.30 | 0.70 | 0.70 |
| MoOx      | TiO2/B1-Mo   | -6.00 | -3.80 | PTB7:PC70BM     | PTB7      | -5.20 | -3.20 | PC70BM | -5.90 | -3.90 | 0.750 | 15.60 | 69.00 | 8.07  | 0 | 201 | 70 | 1.30 | 0.70 | 0.70 |
| MoOx      | TiO2/B1-W    | -6.00 | -4.20 | PTB7:PC70BM     | PTB7      | -5.20 | -3.20 | PC70BM | -5.90 | -3.90 | 0.740 | 14.90 | 66.00 | 7.28  | 0 | 201 | 70 | 1.30 | 0.70 | 0.70 |
| MoOx      | TiO2         | -6.00 | -4.50 | PTB7:PC70BM     | PTB7      | -5.20 | -3.20 | PC70BM | -5.90 | -3.90 | 0.710 | 14.40 | 65.00 | 6.65  | 0 | 201 | 70 | 1.30 | 0.70 | 0.70 |
| PEDOT:PSS | PDIN         | -5.20 | -4.56 | PM6:Y6          | PM6       | -5.54 | -3.61 | Y6     | -5.62 | -4.11 | 0.854 | 25.64 | 70.38 | 15.24 | 1 | 202 | 71 | 1.43 | 0.08 | 0.50 |
| PEDOT:PSS | PDIN/DMeKL   | -5.20 | -4.34 | PM6:Y6          | PM6       | -5.54 | -3.61 | Y6     | -5.62 | -4.11 | 0.849 | 26.61 | 70.89 | 15.96 | 1 | 202 | 71 | 1.43 | 0.08 | 0.50 |
| PEDOT:PSS | DMeKL        | -5.20 | -3.92 | PM6:Y6          | PM6       | -5.54 | -3.61 | Y6     | -5.62 | -4.11 | 0.724 | 11.77 | 49.63 | 4.03  | 0 | 202 | 71 | 1.43 | 0.08 | 0.50 |
| PEDOT:PSS | PDINN        | -5.10 | -3.72 | J11:m-ITTC      | J11       | -5.48 | -3.23 | m-ITTC | -5.62 | -3.89 | 0.934 | 18.68 | 70.02 | 12.21 | 1 | 202 | 72 | 1.46 | 0.09 | 0.60 |
| PEDOT:PSS | PDINN        | -5.10 | -3.72 | PTQ10:IT-4F     | PTQ10     | -5.54 | -2.98 | IT-4F  | -5.74 | -3.90 | 0.929 | 19.97 | 72.24 | 13.40 | 1 | 202 | 72 | 1.46 | 0.09 | 0.60 |
| PEDOT:PSS | PDINO        | -5.10 | -3.88 | J11:m-ITTC      | J11       | -5.48 | -3.23 | m-ITTC | -5.62 | -3.89 | 0.914 | 18.37 | 66.30 | 11.13 | 1 | 202 | 72 | 1.64 | 0.20 | 0.92 |
| PEDOT:PSS | PDINO        | -5.10 | -3.88 | PTQ10:IT-4F     | PTQ10     | -5.54 | -2.98 | IT-4F  | -5.74 | -3.90 | 0.899 | 19.47 | 67.60 | 11.83 | 1 | 202 | 72 | 1.64 | 0.20 | 0.92 |
| PEDOT:PSS | PDINN        | -5.10 | -3.72 | PM6:Y6          | PM6       | -5.56 | -3.50 | Y6     | -5.65 | -4.10 | 0.847 | 25.89 | 78.59 | 17.23 | 1 | 202 | 72 | 1.59 | 0.14 | 0.66 |
| PEDOT:PSS | PDINO        | -5.10 | -3.88 | PM6:Y6          | PM6       | -5.56 | -3.50 | Y6     | -5.65 | -4.10 | 0.821 | 25.58 | 72.24 | 15.17 | 1 | 202 | 72 | 1.59 | 0.14 | 0.66 |
| PEDOT:PSS | ZnO          | -5.20 | -4.10 | P3HT:PCBM       | P3HT      | -5.30 | -3.10 | PCBM   | -6.10 | -3.80 | 0.550 | 4.51  | 31.00 | 0.80  | 0 | 202 | 73 | 1.50 | 0.80 | 0.70 |
| PEDOT:PSS | ZnO:PEIE     | -5.20 | -4.30 | P3HT:PCBM       | P3HT      | -5.30 | -3.10 | PCBM   | -6.10 | -3.80 | 0.540 | 4.73  | 37.00 | 0.95  | 0 | 202 | 73 | 1.50 | 0.80 | 0.70 |
| MoO3      | TiO2:TOPD    | -5.40 | -4.23 | PTB7-Th:PC71BM  | PTB7-Th   | -5.12 | -3.60 | PC71BM | -6.00 | -4.30 | 0.800 | 18.09 | 67.80 | 9.82  | 1 | 201 | 74 | 0.82 | 0.88 | 0.70 |
| MoO3      | TiO2:TOPD-UE | -5.40 | -4.14 | PTB7-Th:PC71BM  | PTB7-Th   | -5.12 | -3.60 | PC71BM | -6.00 | -4.30 | 0.790 | 18.84 | 70.85 | 10.55 | 0 | 201 | 74 | 0.82 | 0.88 | 0.70 |
| MoO3      | TiO2         | -5.40 | -4.43 | PTB7-Th:PC71BM  | PTB7-Th   | -5.12 | -3.60 | PC71BM | -6.00 | -4.30 | 0.770 | 18.13 | 62.24 | 8.73  | 0 | 201 | 74 | 0.82 | 0.88 | 0.70 |

|                  |                   |       |       |                  |           |       |       |        |       |       |       |       |       |       |   |     |    |      |      |      |
|------------------|-------------------|-------|-------|------------------|-----------|-------|-------|--------|-------|-------|-------|-------|-------|-------|---|-----|----|------|------|------|
| MoO3             | ZnO:PEIE:RGO      | -5.30 | -4.25 | PTB7:PCBM        | PTB7      | -5.15 | -3.31 | PCBM   | -6.00 | -4.10 | 0.790 | 15.95 | 70.40 | 8.87  | 0 | 201 | 75 | 1.05 | 0.85 | 0.79 |
| MoO3             | ZnO               | -5.30 | -4.23 | PTB7:PCBM        | PTB7      | -5.15 | -3.31 | PCBM   | -6.00 | -4.10 | 0.780 | 14.28 | 62.00 | 6.91  | 0 | 201 | 75 | 1.05 | 0.85 | 0.79 |
| PEDOT:PSS        | PDINO             | -5.10 | -3.63 | J12:m-ITTC       | J12       | -5.51 | -3.26 | m-ITTC | -5.62 | -3.89 | 0.943 | 16.64 | 55.70 | 8.74  | 1 | 201 | 76 | 1.59 | 0.14 | 0.66 |
| PEDOT:PSS        | PDINO             | -5.10 | -3.63 | J11:m-ITTC       | J11       | -5.48 | -3.23 | m-ITTC | -5.62 | -3.89 | 0.935 | 18.05 | 73.00 | 12.32 | 1 | 201 | 76 | 1.62 | 0.11 | 0.63 |
| MoO3             | SnO2/PeNWs        | -5.30 | -3.90 | PBDB-T-SF:IT-4F  | PBDB-T-SF | -5.40 | -3.60 | IT-4F  | -5.66 | -4.14 | 0.819 | 23.92 | 54.70 | 10.72 | 1 | 202 | 77 | 1.26 | 0.26 | 0.54 |
| MoO3             | SnO2              | -5.30 | -3.65 | PBDB-T-SF:IT-4F  | PBDB-T-SF | -5.40 | -3.60 | IT-4F  | -5.66 | -4.14 | 0.786 | 22.39 | 54.10 | 9.53  | 0 | 202 | 77 | 1.26 | 0.26 | 0.54 |
| PH1000           | PFN-Br            | -4.90 | -3.63 | PM6:Y6           | PM6       | -5.45 | -3.65 | Y6     | -5.65 | -4.10 | 0.837 | 19.12 | 70.60 | 11.30 | 1 | 201 | 78 | 1.35 | 0.20 | 0.45 |
| PH1000           | PFN-Br            | -4.90 | -3.63 | PM6:IT-4F        | PM6       | -5.45 | -3.65 | IT-4F  | -5.66 | -4.14 | 0.835 | 22.46 | 71.85 | 13.48 | 1 | 201 | 78 | 1.31 | 0.21 | 0.49 |
| PEDOT:PSS:5WS2NS | PDINN             | -5.30 | -3.78 | PM6:Y6           | PM6       | -5.50 | -3.56 | Y6     | -5.70 | -4.10 | 0.835 | 25.32 | 73.49 | 15.52 | 1 | 202 | 79 | 1.40 | 0.20 | 0.54 |
| PEDOT:PSS:3WS2NS | PDINN             | -5.27 | -3.78 | PM6:Y6           | PM6       | -5.50 | -3.56 | Y6     | -5.70 | -4.10 | 0.834 | 25.55 | 73.50 | 15.69 | 1 | 202 | 79 | 1.40 | 0.20 | 0.54 |
| PEDOT:PSS        | PDINN             | -5.00 | -3.78 | PM6:Y6           | PM6       | -5.50 | -3.56 | Y6     | -5.70 | -4.10 | 0.833 | 24.08 | 71.48 | 14.35 | 1 | 202 | 79 | 1.40 | 0.20 | 0.54 |
| PEDOT:PSS:1WS2NS | PDINN             | -5.15 | -3.78 | PM6:Y6           | PM6       | -5.50 | -3.56 | Y6     | -5.70 | -4.10 | 0.832 | 25.20 | 72.97 | 15.31 | 1 | 202 | 79 | 1.40 | 0.20 | 0.54 |
| PPy-PEDOT:PSS    | Ca                | -5.16 | -2.80 | PTB7:PC71BM      | PTB7      | -5.15 | -3.31 | PC71BM | -6.00 | -4.00 | 0.760 | 17.55 | 71.06 | 9.48  | 0 | 201 | 80 | 1.20 | 0.80 | 0.70 |
| PPy-PEDOT:PSS    | Ca                | -5.16 | -2.80 | P3HT:PC71BM      | P3HT      | -5.20 | -3.30 | PC71BM | -6.00 | -4.00 | 0.550 | 9.09  | 67.93 | 3.40  | 0 | 201 | 80 | 1.15 | 0.85 | 0.69 |
| PEDOT:PSS:0.15-  | PFN-Br            | -5.06 | -3.90 | PBDB-T:ITIC      | PBDB-T    | -5.52 | -3.68 | ITIC   | -5.70 | -4.00 | 0.910 | 17.31 | 71.14 | 11.22 | 1 | 202 | 81 | 1.52 | 0.18 | 0.32 |
| PEDOT:PSS        | PFN-Br            | -5.10 | -3.90 | PBDB-T:ITIC      | PBDB-T    | -5.52 | -3.68 | ITIC   | -5.70 | -4.00 | 0.900 | 16.23 | 69.91 | 10.21 | 1 | 202 | 81 | 1.52 | 0.18 | 0.32 |
| PEDOT:PSS:0.20-  | PFN-Br            | -5.03 | -3.90 | PBDB-T:ITIC      | PBDB-T    | -5.52 | -3.68 | ITIC   | -5.70 | -4.00 | 0.900 | 16.65 | 70.56 | 10.62 | 1 | 202 | 81 | 1.52 | 0.18 | 0.32 |
| PEDOT:PSS        | PF6NPSBr:10Cs2CO3 | -5.10 | -3.90 | PTB7-Th:PC71BM   | PTB7-Th   | -5.20 | -3.59 | PC71BM | -5.87 | -3.91 | 0.783 | 15.10 | 71.18 | 8.52  | 0 | 201 | 82 | 1.29 | 0.67 | 0.32 |
| PEDOT:PSS        | PF6NPSBr:15Cs2CO3 | -5.10 | -3.85 | PTB7-Th:PC71BM   | PTB7-Th   | -5.20 | -3.59 | PC71BM | -5.87 | -3.91 | 0.764 | 13.43 | 47.15 | 4.90  | 0 | 201 | 82 | 1.29 | 0.67 | 0.32 |
| PEDOT:PSS        | PF6NPSBr:05Cs2CO3 | -5.10 | -4.11 | PTB7-Th:PC71BM   | PTB7-Th   | -5.20 | -3.59 | PC71BM | -5.87 | -3.91 | 0.760 | 14.85 | 65.32 | 7.39  | 0 | 201 | 82 | 1.29 | 0.67 | 0.32 |
| PEDOT:PSS        | PF6NPSBr          | -5.10 | -4.20 | PTB7-Th:PC71BM   | PTB7-Th   | -5.20 | -3.59 | PC71BM | -5.87 | -3.91 | 0.743 | 14.83 | 62.44 | 6.97  | 0 | 201 | 82 | 1.29 | 0.67 | 0.32 |
| PEDOT:PSS        | QPhPBr            | -5.10 | -3.95 | PTB7-Th:PC71BM   | PTB7-Th   | -5.17 | -3.59 | PC71BM | -5.87 | -3.91 | 0.815 | 16.78 | 67.12 | 9.18  | 1 | 201 | 83 | 1.26 | 0.70 | 0.32 |
| PEDOT:PSS        | N719:QPhPBr       | -5.10 | -3.93 | PTB7-Th:PC71BM   | PTB7-Th   | -5.17 | -3.59 | PC71BM | -5.87 | -3.91 | 0.814 | 17.26 | 69.96 | 9.83  | 1 | 201 | 83 | 1.26 | 0.70 | 0.32 |
| PEDOT:PSS        | N719              | -5.10 | -3.16 | PTB7-Th:PC71BM   | PTB7-Th   | -5.17 | -3.59 | PC71BM | -5.87 | -3.91 | 0.803 | 16.34 | 65.41 | 8.58  | 1 | 201 | 83 | 1.26 | 0.70 | 0.32 |
| PEDOT:PSS        | QPhPBr            | -5.10 | -3.95 | PBDTTT-CT:PC71BM | PBDTTT-CT | -5.11 | -3.25 | PC71BM | -5.87 | -3.91 | 0.771 | 16.64 | 65.68 | 8.42  | 0 | 201 | 83 | 1.20 | 0.76 | 0.66 |
| PEDOT:PSS        | N719:QPhPBr       | -5.10 | -3.93 | PBDTTT-CT:PC71BM | PBDTTT-CT | -5.11 | -3.25 | PC71BM | -5.87 | -3.91 | 0.770 | 17.01 | 66.22 | 8.69  | 0 | 201 | 83 | 1.20 | 0.76 | 0.66 |
| PEDOT:PSS        | N719              | -5.10 | -3.16 | PBDTTT-CT:PC71BM | PBDTTT-CT | -5.11 | -3.25 | PC71BM | -5.87 | -3.91 | 0.752 | 15.52 | 65.23 | 7.61  | 0 | 201 | 83 | 1.20 | 0.76 | 0.66 |
| MoO3             | ZnO               | -5.30 | -4.40 | PTB7-Th:PC71BM   | PTB7-Th   | -5.20 | -3.60 | PC71BM | -6.10 | -3.90 | 0.780 | 16.81 | 67.51 | 8.89  | 0 | 201 | 84 | 1.30 | 0.90 | 0.30 |
| MoO3             | PCBB-N-I          | -5.30 | -4.07 | PTB7-Th:PC71BM   | PTB7-Th   | -5.20 | -3.60 | PC71BM | -6.10 | -3.90 | 0.780 | 17.12 | 63.35 | 8.45  | 0 | 201 | 84 | 1.30 | 0.90 | 0.30 |
| MoO3             | PCBB-3N-3I        | -5.30 | -4.00 | PTB7-Th:PC71BM   | PTB7-Th   | -5.20 | -3.60 | PC71BM | -6.10 | -3.90 | 0.780 | 19.68 | 69.10 | 10.62 | 0 | 201 | 84 | 1.30 | 0.90 | 0.30 |
| MoO3             | ZnO               | -5.00 | -4.20 | PBDB-T:ITIC      | PBDB-T    | -5.52 | -3.68 | ITIC   | -5.70 | -4.00 | 0.900 | 16.91 | 67.80 | 10.32 | 1 | 202 | 85 | 1.52 | 0.18 | 0.32 |
| MoO3             | ZnO:0.03GHK-Cu    | -5.00 | -4.19 | PBDB-T:ITIC      | PBDB-T    | -5.52 | -3.68 | ITIC   | -5.70 | -4.00 | 0.900 | 17.44 | 68.80 | 10.80 | 1 | 202 | 85 | 1.52 | 0.18 | 0.32 |
| MoO3             | ZnO:0.05GHK-Cu    | -5.00 | -4.18 | PBDB-T:ITIC      | PBDB-T    | -5.52 | -3.68 | ITIC   | -5.70 | -4.00 | 0.900 | 18.10 | 70.60 | 11.50 | 1 | 202 | 85 | 1.52 | 0.18 | 0.32 |
| MoO3             | ZnO:0.10GHK-Cu    | -5.00 | -4.17 | PBDB-T:ITIC      | PBDB-T    | -5.52 | -3.68 | ITIC   | -5.70 | -4.00 | 0.900 | 18.33 | 72.30 | 11.93 | 1 | 202 | 85 | 1.52 | 0.18 | 0.32 |
| MoO3             | ZnO:0.30GHK-Cu    | -5.00 | -4.15 | PBDB-T:ITIC      | PBDB-T    | -5.52 | -3.68 | ITIC   | -5.70 | -4.00 | 0.900 | 17.93 | 69.70 | 11.25 | 1 | 202 | 85 | 1.52 | 0.18 | 0.32 |
| L-GO             | ZnO               | -4.98 | -4.40 | PTB7-Th:PC71BM   | PTB7-Th   | -5.22 | -3.64 | PC71BM | -5.80 | -4.00 | 0.780 | 18.39 | 61.00 | 8.80  | 0 | 201 | 86 | 1.22 | 0.58 | 0.36 |
| L-GO:NiOx        | ZnO               | -4.97 | -4.40 | PTB7-Th:PC71BM   | PTB7-Th   | -5.22 | -3.64 | PC71BM | -5.80 | -4.00 | 0.780 | 19.16 | 65.00 | 9.73  | 0 | 201 | 86 | 1.22 | 0.58 | 0.36 |
| NiOx             | ZnO               | -4.76 | -4.40 | PTB7-Th:PC71BM   | PTB7-Th   | -5.22 | -3.64 | PC71BM | -5.80 | -4.00 | 0.570 | 17.63 | 55.00 | 5.52  | 0 | 201 | 86 | 1.22 | 0.58 | 0.36 |



|                  |            |       |       |                |          |       |       |        |       |       |       |       |       |       |   |     |    |      |      |      |
|------------------|------------|-------|-------|----------------|----------|-------|-------|--------|-------|-------|-------|-------|-------|-------|---|-----|----|------|------|------|
| MoOx             | TSi/sg-ZnO | -5.30 | -4.21 | PBDFP-Bz:Y6    | PBDFP-Bz | -5.50 | -3.46 | Y6     | -5.65 | -4.10 | 0.841 | 25.14 | 77.42 | 16.37 | 1 | 202 | 87 | 1.40 | 0.15 | 0.64 |
| MoOx             | sg-ZnO     | -5.30 | -4.45 | PBDFP-Bz:Y6    | PBDFP-Bz | -5.50 | -3.46 | Y6     | -5.65 | -4.10 | 0.822 | 24.39 | 75.30 | 15.10 | 1 | 202 | 87 | 1.40 | 0.15 | 0.64 |
| PEDOT:PSS        | ZnO        | -5.23 | -4.20 | PTB7-Th:PC71BM | PTB7-Th  | -5.30 | -3.80 | PC71BM | -5.90 | -3.90 | 0.793 | 15.49 | 70.12 | 8.62  | 0 | 201 | 88 | 1.40 | 0.60 | 0.10 |
| PEDOT:PSS/TTF-py | ZnO        | -5.29 | -4.20 | PTB7-Th:PC71BM | PTB7-Th  | -5.30 | -3.80 | PC71BM | -5.90 | -3.90 | 0.790 | 17.19 | 70.57 | 9.58  | 0 | 201 | 88 | 1.40 | 0.60 | 0.10 |
| MoOx/BPQD2       | ZnO/BPQD1  | -5.12 | -4.21 | PTB7-Th:FOIC   | PTB7-Th  | -5.20 | -3.56 | FOIC   | -5.36 | -3.92 | 0.724 | 25.80 | 70.50 | 13.10 | 0 | 201 | 89 | 1.28 | 0.16 | 0.36 |
| MoOx             | ZnO/BPQD1  | -5.30 | -4.21 | PTB7-Th:FOIC   | PTB7-Th  | -5.20 | -3.56 | FOIC   | -5.36 | -3.92 | 0.715 | 25.60 | 69.60 | 12.70 | 0 | 201 | 89 | 1.28 | 0.16 | 0.36 |
| MoOx/BPQD2       | ZnO        | -5.12 | -4.30 | PTB7-Th:FOIC   | PTB7-Th  | -5.20 | -3.56 | FOIC   | -5.36 | -3.92 | 0.715 | 25.30 | 69.10 | 12.40 | 0 | 201 | 89 | 1.28 | 0.16 | 0.36 |
| MoOx             | ZnO        | -5.30 | -4.30 | PTB7-Th:FOIC   | PTB7-Th  | -5.20 | -3.56 | FOIC   | -5.36 | -3.92 | 0.711 | 24.10 | 68.90 | 11.80 | 0 | 201 | 89 | 1.28 | 0.16 | 0.36 |
| TTA              | ZnO        | -5.26 | -4.20 | PTB7-Th:PC71BM | PTB7-Th  | -5.30 | -3.80 | PC71BM | -5.90 | -3.90 | 0.794 | 15.95 | 69.21 | 9.09  | 0 | 201 | 90 | 1.40 | 0.60 | 0.10 |
| PEDOT:PSS        | ZnO        | -5.10 | -4.20 | PTB7-Th:PC71BM | PTB7-Th  | -5.30 | -3.80 | PC71BM | -5.90 | -3.90 | 0.789 | 15.46 | 68.59 | 8.61  | 0 | 201 | 90 | 1.40 | 0.60 | 0.10 |
| MoO3             | CD:2.0ZnO  | -5.60 | -3.92 | PM6:IT-4F      | PM6      | -5.45 | -3.65 | IT-4F  | -5.66 | -4.14 | 0.830 | 20.75 | 71.00 | 12.23 | 1 | 202 | 91 | 1.31 | 0.21 | 0.49 |
| MoO3             | CD:0.5ZnO  | -5.60 | -3.97 | PM6:IT-4F      | PM6      | -5.45 | -3.65 | IT-4F  | -5.66 | -4.14 | 0.820 | 20.32 | 72.00 | 12.00 | 1 | 202 | 91 | 1.31 | 0.21 | 0.49 |
| MoO3             | CD:1.0ZnO  | -5.60 | -3.92 | PM6:IT-4F      | PM6      | -5.45 | -3.65 | IT-4F  | -5.66 | -4.14 | 0.820 | 20.90 | 70.00 | 12.01 | 1 | 202 | 91 | 1.31 | 0.21 | 0.49 |
| MoO3             | ZnO        | -5.60 | -4.04 | PM6:IT-4F      | PM6      | -5.45 | -3.65 | IT-4F  | -5.66 | -4.14 | 0.810 | 20.44 | 68.00 | 11.26 | 1 | 202 | 91 | 1.31 | 0.21 | 0.49 |
| MoO3             | CD:3.0ZnO  | -5.60 | -4.01 | PM6:IT-4F      | PM6      | -5.45 | -3.65 | IT-4F  | -5.66 | -4.14 | 0.800 | 21.21 | 63.00 | 10.69 | 1 | 202 | 91 | 1.31 | 0.21 | 0.49 |
| MoO3             | HfACBV4    | -5.40 | -3.90 | PM6:Y6         | PM6      | -5.40 | -3.65 | Y6     | -5.65 | -4.10 | 0.820 | 25.27 | 71.01 | 14.61 | 1 | 202 | 92 | 1.30 | 0.25 | 0.45 |
| MoO3             | ACBV       | -5.40 | -3.81 | PM6:Y6         | PM6      | -5.40 | -3.65 | Y6     | -5.65 | -4.10 | 0.770 | 24.11 | 62.07 | 11.37 | 0 | 202 | 92 | 1.30 | 0.25 | 0.45 |
| MoO3             | ZnO/TCNE   | -5.40 | -4.04 | PTB7:PC71BM    | PTB7     | -5.25 | -3.13 | PC71BM | -5.90 | -3.90 | 0.760 | 18.60 | 64.20 | 8.59  | 0 | 202 | 93 | 1.35 | 0.65 | 0.77 |
| MoO3             | ZnO        | -5.40 | -4.14 | PTB7:PC71BM    | PTB7     | -5.25 | -3.13 | PC71BM | -5.90 | -3.90 | 0.730 | 16.20 | 57.60 | 7.47  | 0 | 202 | 93 | 1.35 | 0.65 | 0.77 |
| PEDOT:PSS        | PFN-Br     | -5.10 | -3.90 | PBDB-T:ITIC    | PBDB-T   | -5.52 | -3.68 | ITIC   | -5.70 | -4.00 | 0.900 | 16.14 | 69.59 | 10.11 | 1 | 201 | 94 | 1.52 | 0.18 | 0.32 |
| Ti3C2Tx          | PFN-Br     | -5.00 | -3.90 | PBDB-T:ITIC    | PBDB-T   | -5.52 | -3.68 | ITIC   | -5.70 | -4.00 | 0.880 | 17.85 | 67.06 | 10.53 | 1 | 201 | 94 | 1.52 | 0.18 | 0.32 |
| PEDOT:PSS        | BIPO       | -5.00 | -3.82 | PTB7:PC71BM    | PTB7     | -5.20 | -3.30 | PC71BM | -5.90 | -3.90 | 0.730 | 16.17 | 59.00 | 7.63  | 0 | 202 | 95 | 1.30 | 0.70 | 0.60 |
| PEDOT:PSS        | TIPO       | -5.00 | -4.04 | PTB7:PC71BM    | PTB7     | -5.20 | -3.30 | PC71BM | -5.90 | -3.90 | 0.700 | 15.82 | 58.00 | 7.04  | 0 | 202 | 95 | 1.30 | 0.70 | 0.60 |
| PEDOT:PSS        | P3P-NBr    | -5.10 | -3.84 | J71:ITIC       | J71      | -5.40 | -3.24 | ITIC   | -5.51 | -3.84 | 0.941 | 16.47 | 67.48 | 10.46 | 1 | 201 | 96 | 1.56 | 0.11 | 0.60 |
| PEDOT:PSS        | P1P-NO     | -5.10 | -3.72 | J71:ITIC       | J71      | -5.40 | -3.24 | ITIC   | -5.51 | -3.84 | 0.940 | 17.47 | 70.35 | 11.56 | 1 | 201 | 96 | 1.56 | 0.11 | 0.60 |
| PEDOT:PSS        | P4P-NBr    | -5.10 | -3.60 | J71:ITIC       | J71      | -5.40 | -3.24 | ITIC   | -5.51 | -3.84 | 0.939 | 16.45 | 55.28 | 8.54  | 1 | 201 | 96 | 1.56 | 0.11 | 0.60 |
| PEDOT:PSS        | P2P-NBr    | -5.10 | -3.58 | J71:ITIC       | J71      | -5.40 | -3.24 | ITIC   | -5.51 | -3.84 | 0.938 | 16.08 | 65.50 | 9.90  | 1 | 201 | 96 | 1.56 | 0.11 | 0.60 |
| PEDOT:PSS        | PDI-NBr    | -5.10 | -3.79 | J71:ITIC       | J71      | -5.40 | -3.24 | ITIC   | -5.51 | -3.84 | 0.936 | 15.85 | 48.14 | 7.14  | 1 | 201 | 96 | 1.56 | 0.11 | 0.60 |
| PEDOT:PSS        | PDI-NO     | -5.10 | -3.59 | J71:ITIC       | J71      | -5.40 | -3.24 | ITIC   | -5.51 | -3.84 | 0.935 | 17.14 | 69.19 | 11.09 | 1 | 201 | 96 | 1.56 | 0.11 | 0.60 |
| PEDOT:PSS        | P2P-NO     | -5.10 | -3.75 | J71:ITIC       | J71      | -5.40 | -3.24 | ITIC   | -5.51 | -3.84 | 0.934 | 17.38 | 65.26 | 10.60 | 1 | 201 | 96 | 1.56 | 0.11 | 0.60 |
| PEDOT:PSS        | P1P-NBr    | -5.10 | -3.70 | J71:ITIC       | J71      | -5.40 | -3.24 | ITIC   | -5.51 | -3.84 | 0.929 | 16.05 | 58.71 | 8.76  | 1 | 201 | 96 | 1.56 | 0.11 | 0.60 |
| PEDOT:PSS        | P3P-NO     | -5.10 | -3.70 | J71:ITIC       | J71      | -5.40 | -3.24 | ITIC   | -5.51 | -3.84 | 0.926 | 17.11 | 64.81 | 10.27 | 1 | 201 | 96 | 1.56 | 0.11 | 0.60 |
| PEDOT:PSS        | P4P-NO     | -5.10 | -3.69 | J71:ITIC       | J71      | -5.40 | -3.24 | ITIC   | -5.51 | -3.84 | 0.917 | 16.21 | 65.24 | 9.60  | 1 | 201 | 96 | 1.56 | 0.11 | 0.60 |
| PEDOT:PSS        | 3FPy       | -5.20 | -4.33 | PTB7:PC71BM    | PTB7     | -5.20 | -3.30 | PC71BM | -5.90 | -3.90 | 0.750 | 15.40 | 62.00 | 7.16  | 0 | 202 | 97 | 1.30 | 0.70 | 0.60 |
| PEDOT:PSS        | MeOH       | -5.20 | -4.80 | PTB7:PC71BM    | PTB7     | -5.20 | -3.30 | PC71BM | -5.90 | -3.90 | 0.640 | 15.50 | 55.10 | 5.47  | 0 | 202 | 97 | 1.30 | 0.70 | 0.60 |
| MoOx             | PBSON-P    | -5.30 | -4.65 | PTB7-Th:PC71BM | PTB7-Th  | -5.30 | -3.70 | PC71BM | -5.90 | -3.90 | 0.780 | 17.02 | 69.55 | 9.32  | 0 | 201 | 98 | 1.40 | 0.60 | 0.20 |
| MoOx             | PBSON-FEO  | -5.30 | -4.58 | PTB7-Th:PC71BM | PTB7-Th  | -5.30 | -3.70 | PC71BM | -5.90 | -3.90 | 0.780 | 17.06 | 70.28 | 9.58  | 0 | 201 | 98 | 1.40 | 0.60 | 0.20 |
| PEDOT:PSS        | PBSON-P    | -5.20 | -4.65 | PTB7-Th:PC71BM | PTB7-Th  | -5.30 | -3.70 | PC71BM | -5.90 | -3.90 | 0.780 | 16.28 | 70.18 | 9.08  | 0 | 201 | 98 | 1.40 | 0.60 | 0.20 |

|               |              |       |       |                |         |       |       |        |       |       |       |       |       |       |   |     |     |      |      |      |
|---------------|--------------|-------|-------|----------------|---------|-------|-------|--------|-------|-------|-------|-------|-------|-------|---|-----|-----|------|------|------|
| PEDOT:PSS     | PBSON-FEO    | -5.20 | -4.58 | PTB7-Th:PC71BM | PTB7-Th | -5.30 | -3.70 | PC71BM | -5.90 | -3.90 | 0.780 | 16.24 | 70.66 | 9.10  | 0 | 201 | 98  | 1.40 | 0.60 | 0.20 |
| MoOx          | ZnO          | -5.60 | -3.77 | PBDB-T:ITIC-M  | PBDB-T  | -5.30 | -3.50 | ITIC-M | -5.40 | -3.80 | 0.930 | 18.09 | 70.00 | 11.76 | 1 | 202 | 99  | 1.50 | 0.10 | 0.30 |
| MoOx          | PEIE-EDT     | -5.60 | -3.70 | PBDB-T:ITIC-M  | PBDB-T  | -5.30 | -3.50 | ITIC-M | -5.40 | -3.80 | 0.920 | 19.16 | 69.00 | 12.06 | 1 | 202 | 99  | 1.50 | 0.10 | 0.30 |
| MoOx          | PEIE         | -5.60 | -3.90 | PBDB-T:ITIC-M  | PBDB-T  | -5.30 | -3.50 | ITIC-M | -5.40 | -3.80 | 0.860 | 18.92 | 59.00 | 9.60  | 1 | 202 | 99  | 1.50 | 0.10 | 0.30 |
| MoO3          | LA-PEIE      | -5.20 | -4.10 | PTB7-Th:PC70BM | PTB7-Th | -5.30 | -3.70 | PC70BM | -6.10 | -4.20 | 0.820 | 19.33 | 68.00 | 10.57 | 1 | 202 | 100 | 1.10 | 0.80 | 0.50 |
| MoO3          | ZnO          | -5.20 | -4.30 | PTB7-Th:PC70BM | PTB7-Th | -5.30 | -3.70 | PC70BM | -6.10 | -4.20 | 0.800 | 18.63 | 67.00 | 9.46  | 1 | 202 | 100 | 1.10 | 0.80 | 0.50 |
| MoO3          | PEIE         | -5.20 | -4.40 | PTB7-Th:PC70BM | PTB7-Th | -5.30 | -3.70 | PC70BM | -6.10 | -4.20 | 0.800 | 17.73 | 66.00 | 9.30  | 1 | 202 | 100 | 1.10 | 0.80 | 0.50 |
| MoO3          | PCBM:5.0TMHT | -6.70 | -4.40 | PM6:IT-4F      | PM6     | -5.50 | -3.70 | IT-4F  | -5.70 | -4.00 | 0.840 | 19.83 | 69.00 | 11.41 | 1 | 202 | 101 | 1.50 | 0.20 | 0.30 |
| MoO3          | PCBM:2.0TMHT | -6.70 | -4.50 | PM6:IT-4F      | PM6     | -5.50 | -3.70 | IT-4F  | -5.70 | -4.00 | 0.800 | 18.98 | 57.00 | 8.65  | 1 | 202 | 101 | 1.50 | 0.20 | 0.30 |
| MoO3          | PCBM:0.1TMHT | -6.70 | -4.60 | PM6:IT-4F      | PM6     | -5.50 | -3.70 | IT-4F  | -5.70 | -4.00 | 0.720 | 13.97 | 25.00 | 2.51  | 0 | 202 | 101 | 1.50 | 0.20 | 0.30 |
| CuSCN         | BCP          | -5.56 | -3.50 | PM6:Y6         | PM6     | -5.50 | -3.61 | Y6     | -5.65 | -4.10 | 0.850 | 22.07 | 70.10 | 13.13 | 1 | 202 | 102 | 1.40 | 0.15 | 0.49 |
| CuSCN:TfB     | BCP          | -5.50 | -3.50 | PM6:Y6         | PM6     | -5.50 | -3.61 | Y6     | -5.65 | -4.10 | 0.850 | 24.35 | 73.84 | 15.28 | 1 | 202 | 102 | 1.40 | 0.15 | 0.49 |
| PFS           | PFSF         | -5.15 | -2.95 | PBDB-T:IT-M    | PBDB-T  | -5.15 | -3.41 | IT-M   | -5.58 | -3.85 | 0.893 | 16.90 | 67.00 | 10.20 | 1 | 201 | 103 | 1.30 | 0.43 | 0.44 |
| PFS           | PFS          | -5.15 | -2.80 | PBDB-T:IT-M    | PBDB-T  | -5.15 | -3.41 | IT-M   | -5.58 | -3.85 | 0.871 | 16.90 | 65.00 | 9.54  | 1 | 201 | 103 | 1.30 | 0.43 | 0.44 |
| PFSF          | PFSF         | -5.34 | -2.95 | PBDB-T:IT-M    | PBDB-T  | -5.15 | -3.41 | IT-M   | -5.58 | -3.85 | 0.836 | 16.20 | 44.00 | 5.89  | 1 | 201 | 103 | 1.30 | 0.43 | 0.44 |
| PFB           | PFB          | -5.70 | -2.77 | PBDB-T:IT-M    | PBDB-T  | -5.15 | -3.41 | IT-M   | -5.58 | -3.85 | 0.768 | 14.00 | 17.00 | 1.80  | 0 | 201 | 103 | 1.30 | 0.43 | 0.44 |
| MoOx          | ZnO:Li       | -5.30 | -4.02 | PTB7-Th:IT-4F  | PTB7-Th | -5.40 | -3.80 | IT-4F  | -5.66 | -4.14 | 0.830 | 16.12 | 67.00 | 8.96  | 1 | 201 | 104 | 1.40 | 0.50 | 0.20 |
| MoOx          | ZnO:Li       | -5.30 | -4.02 | PTB7-Th:PC71BM | PTB7-Th | -5.40 | -3.80 | PC71BM | -5.90 | -4.00 | 0.800 | 17.94 | 70.00 | 10.05 | 1 | 201 | 104 | 1.40 | 0.50 | 0.20 |
| MoOx          | ZnO          | -5.30 | -3.95 | PTB7-Th:IT-4F  | PTB7-Th | -5.40 | -3.80 | IT-4F  | -5.66 | -4.14 | 0.790 | 15.02 | 63.00 | 7.47  | 0 | 201 | 104 | 1.26 | 0.26 | 0.34 |
| MoOx          | ZnO          | -5.30 | -3.95 | PTB7-Th:PC71BM | PTB7-Th | -5.40 | -3.80 | PC71BM | -5.90 | -4.00 | 0.760 | 16.62 | 68.00 | 8.59  | 0 | 201 | 104 | 1.26 | 0.26 | 0.34 |
| PEDOT:PSS@PWA | PDIN         | -5.48 | -3.72 | PM6:Y6         | PM6     | -5.48 | -3.61 | Y6     | -5.65 | -4.10 | 0.867 | 25.70 | 76.30 | 16.90 | 1 | 202 | 105 | 1.38 | 0.17 | 0.49 |
| PEDOT:PSS     | PDIN         | -5.30 | -3.72 | PM6:Y6         | PM6     | -5.48 | -3.61 | Y6     | -5.65 | -4.10 | 0.854 | 24.70 | 74.80 | 15.60 | 1 | 202 | 105 | 1.38 | 0.17 | 0.49 |
| PEDOT:PSS     | PDINO        | -5.10 | -3.63 | BTEC-2F:Y6     | BTEC-2F | -5.39 | -3.38 | Y6     | -5.65 | -4.10 | 0.854 | 21.55 | 72.35 | 13.34 | 1 | 202 | 106 | 1.29 | 0.26 | 0.72 |
| PEDOT:PSS     | PDINO        | -5.10 | -3.63 | BT-2F:Y6       | BT-2F   | -5.40 | -3.40 | Y6     | -5.65 | -4.10 | 0.853 | 22.38 | 72.27 | 13.80 | 1 | 202 | 106 | 1.30 | 0.25 | 0.70 |

**Table S2.** The energy level/work function values of the materials in OSCs from the literature.

| Materials           | Energy levels |       | Ref |
|---------------------|---------------|-------|-----|
| PTB7                | -5.15         | -3.31 | 112 |
| PTB7-Th             | -5.24         | -3.62 | 112 |
| PffBT4T-2OD         | -5.34         | -3.69 | 113 |
| PM6                 | -5.50         | -3.61 | 114 |
| PC <sub>71</sub> BM | -6.10         | -3.90 | 112 |
| Y6                  | -5.65         | -4.10 | 114 |
| ITIC-M              | -5.58         | -3.98 | 115 |
| PEDOT:PSS           | -5.10         |       | 116 |
| PDINO               | -3.63         |       | 116 |
| MoO <sub>x</sub>    | -5.60         |       | 117 |
| ZnO                 | -4.40         |       | 117 |

**Table S3.** Device characteristics of the organic solar cells using the same structure in literature. And the relative error (%) between the predicted values of  $V_{oc}$  based on XGBoost model and measured  $V_{oc}$  in literature, which is calculated as =  $[(V_{oc\ predicted} - V_{oc\ measured}) / V_{oc\ measured}] * 100\%$ .

| Ref | $V_{oc}$ (V) | Relative error (%) | Active layer                                     | $J_{sc}$ (mA/cm <sup>2</sup> ) | FF (%) | PCE (%) | HTL              | ETL  |
|-----|--------------|--------------------|--------------------------------------------------|--------------------------------|--------|---------|------------------|------|
| 118 | 0.73         | 8.22%              | PTB7:PC <sub>71</sub> BM <sub>(CF)</sub>         | 18.52                          | 66.0   | 8.95    | PEDOT:PS         | LiF  |
|     | 0.75         | 5.33%              | PTB7:PC <sub>71</sub> BM <sub>(O-CB)</sub>       | 15.98                          | 66.0   | 7.97    | PEDOT:PS         | LiF  |
|     | 0.74         | 6.75%              | PTB7:PC <sub>71</sub> BM <sub>(CB)</sub>         | 19.64                          | 67.0   | 9.64    | PEDOT:PS         | LiF  |
| 119 | 0.80         | 0%                 | PTB7-Th:PC <sub>71</sub> BM                      | 12.92                          | 44.0   | 4.58    | PEDOT:PS         | LiF  |
| 120 | 0.79         | 1.27%              | PTB7-Th:PC <sub>71</sub> BM                      | 20.70                          | 59.0   | 9.80    | PEDOT:PS         | LiF  |
|     | 0.78         | 2.56%              | PTB7-Th:PC <sub>71</sub> BM <sub>(1:1.2)</sub>   | 16.90                          | 54.0   | 7.20    | PEDOT:PS         | LiF  |
| 121 | 0.74         | 5.76%              | PTB7:PC <sub>71</sub> BM                         | 16.06                          | 69.6   | 8.36    | PEDOT:PS         | LiF  |
| 122 | 0.78         | 5.13%              | PffBT4T-2OD:PC <sub>71</sub> BM                  | 15.896                         | 64.4   | 8.08    | PEDOT:PS         | LiF  |
|     | 0.78         | 5.13%              | PffBT4T-2OD:PC <sub>71</sub> BM <sub>(ODT)</sub> | 15.993                         | 61.9   | 7.72    | PEDOT:PS         | LiF  |
|     | 0.79         | 3.80%              | PffBT4T-2OD:PC <sub>71</sub> BM <sub>(DIO)</sub> | 16.785                         | 66.4   | 8.91    | PEDOT:PS         | LiF  |
|     | 0.78         | 5.13%              | PffBT4T-2OD:PC <sub>71</sub> BM <sub>(DPE)</sub> | 17.304                         | 69.0   | 9.31    | PEDOT:PS         | LiF  |
|     | 0.79         | 3.80%              | PffBT4T-2OD:PC <sub>71</sub> BM <sub>(CN)</sub>  | 17.752                         | 73.1   | 10.2    | PEDOT:PS         | LiF  |
| 123 | 0.71         | 5.63%              | PTB7:PC <sub>71</sub> BM <sub>(DIO)</sub>        | 14.50                          | 67.1   | 6.96    | MoO <sub>3</sub> | ZnO  |
|     | 0.70         | 7.14%              | PTB7:PC <sub>71</sub> BM <sub>(DPE)</sub>        | 14.80                          | 64.6   | 6.69    | MoO <sub>3</sub> | ZnO  |
|     | 0.72         | 4.17%              | PTB7:PC <sub>71</sub> BM <sub>(DIO+DPE)</sub>    | 18.10                          | 71.0   | 9.25    | MoO <sub>3</sub> | ZnO  |
| 124 | 0.74         | 1.35%              | PTB7:PC <sub>70</sub> BM                         | 13.20                          | 65.4   | 6.44    | MoO <sub>x</sub> | ZnO  |
|     | 0.77         | 6.49%              | PffBT4T-2OD:PC <sub>70</sub> BM                  | 17.90                          | 66.0   | 9.16    | MoO <sub>x</sub> | ZnO  |
| 125 | 0.78         | 2.56%              | PTB7-Th:PC <sub>71</sub> BM                      | 17.88                          | 66.0   | 9.30    | MoO <sub>3</sub> | ZnO  |
| 126 | 0.74         | 1.35%              | PTB7:PCBM                                        | 15.00                          | 70.0   | 7.80    | MoO <sub>3</sub> | ZnO  |
|     | 0.80         | 0%                 | PTB7-Th:PCBM                                     | 15.60                          | 65.0   | 8.10    | MoO <sub>3</sub> | ZnO  |
|     | 1.02         | 7.84%              | PM6:ITIC                                         | 12.70                          | 61.0   | 7.90    | MoO <sub>3</sub> | ZnO  |
| 127 | 1.03         | 8.74%              | PM6:IT-M                                         | 12.81                          | 67.9   | 8.86    | PEDOT:PS         | PDIN |
|     | 0.86         | 4.65%              | PM6:Y6                                           | 24.77                          | 70.7   | 14.8    | PEDOT:PS         | PDIN |

|     |      |        |                        |       |      |      |          |      |
|-----|------|--------|------------------------|-------|------|------|----------|------|
| 128 | 1.03 | 8.74%  | PM6:IT-M               | 15.65 | 64.6 | 10.3 | PEDOT:PS | PDIN |
| 129 | 0.80 | 12.07% | PM6:Y6 <sub>(CB)</sub> | 23.09 | 69.9 | 12.9 | PEDOT:PS | PDIN |
|     | 0.83 | 8.17%  | PM6:Y6 <sub>(CF)</sub> | 25.60 | 73.5 | 15.6 | PEDOT:PS | PDIN |
| 130 | 0.86 | 4.65%  | PM6:Y6                 | 24.30 | 73.2 | 15.3 | PEDOT:PS | PDIN |
| 131 | 0.85 | 5.63%  | PM6:Y6                 | 25.62 | 73.4 | 16.0 | PEDOT:PS | PDIN |

## References:

- [1] Guo, B., Yin, Q., Zhou, J., Li, W., Zhang, K., & Li, Y. Semiconductive polymer-doped PEDOT with high work function, conductivity, reversible dispersion, and application in organic solar cells. *ACS Sustainable Chemistry & Engineering*, 2019, 7(9), 8206-8214.
- [2] Chen, X., Xu, G., Zeng, G., Gu, H., Chen, H., Xu, H., & Li, Y. Realizing ultrahigh mechanical flexibility and >15% efficiency of flexible organic solar cells via a “welding” flexible transparent electrode. *Advanced Materials*, 2020, 32(14), 1908478.
- [3] Lu, L., Liao, Q., Zu, Y., Xu, Y., Xu, B., & Hou, J. Significant effect of fluorination on simultaneously improving work function and transparency of anode interlayer for organic solar cells. *Advanced Energy Materials*, 2019, 9(15), 1803826.
- [4] Zeng, M., Wang, X., Ma, R., Zhu, W., Li, Y., Chen, Z., & Cao, Y. Dopamine semiquinone radical doped PEDOT: PSS: Enhanced conductivity, work function and performance in organic solar cells. *Advanced Energy Materials*, 2020, 10(25), 2000743.
- [5] Mutlu, A., Can, M., & Tozlu, C. Performance improvement of organic solar cell via incorporation of donor type self-assembled interfacial monolayer. *Thin Solid Films*, 2019, 685, 88-96.
- [6] Yao, J., Qiu, B., Zhang, Z. G., Xue, L., Wang, R., Zhang, C., & Li, Y. Cathode engineering with perylene-diimide interlayer enabling over 17% efficiency single-junction organic solar cells. *Nature communications*, 2020, 11(1), 1-10.
- [7] Erray, M., Hanine, M., Boufounas, E. M., & El Amrani, A. Combined effects of carriers charge mobility and electrodes work function on the performances of polymer/fullerene P3HT: PCBM based organic photovoltaic solar cell. *The European physical journal applied physics*, 2018, 82(3), 30201.
- [8] Cui, Y., Jia, G., Zhu, J., Kang, Q., Yao, H., Lu, L., & Hou, J. The critical role of anode work function in non-fullerene organic solar cells unveiled by counterion-size-controlled self-doping conjugated polymers. *Chemistry of Materials*, 2018, 30(3), 1078-1084.
- [9] Xue, Z., Liu, X., Lv, Y., Zhang, N., & Guo, X. Low-work-function, ITO-free transparent cathodes for inverted polymer solar cells. *ACS applied materials & interfaces*, 2015, 7(36), 19960-19965.
- [10] Cai, Y., Chang, L., You, L., Fan, B., Liu, H., & Sun, Y. Novel nonconjugated polymer as cathode buffer layer for efficient organic solar cells. *ACS applied materials & interfaces*, 2018, 10(28), 24082-24089.
- [11] Tang, H., Feng, H., Wang, H., Wan, X., Liang, J., & Chen, Y. Highly conducting MXene–silver nanowire transparent electrodes for flexible organic solar cells. *ACS applied materials & interfaces*, 2019, 11(28), 25330-25337.
- [12] Yu, Z., Li, B., & Ouyang, J. Metal ion/dendrimer complexes with tunable work functions in a wide range and their application as electron-and hole-transport materials of non-fullerene organic solar cells. *Advanced Functional Materials*, 2018, 28(33), 1802554.
- [13] Song, W., Fan, X., Xu, B., Yan, F., Cui, H., Wei, Q., & Ge, Z. All-solution-processed metal-oxide-free flexible organic solar cells with over 10% efficiency. *Advanced Materials*, 2018, 30(26), 1800075.
- [14] Jo, J. W., Jung, J. W., Bae, S., Ko, M. J., Kim, H., Jo, W. H., & Son, H. J. Development of Self-Doped Conjugated Polyelectrolytes with Controlled Work Functions and Application to Hole Transport Layer Materials for High-Performance Organic Solar Cells. *Advanced Materials Interfaces*, 2016, 3(12), 1500703.

- [15] Wang, S., Li, Z., Xu, X., Zhang, G., Li, Y., & Peng, Q. Amino-functionalized graphene quantum dots as cathode interlayer for efficient organic solar cells: quantum dot size on interfacial modification ability and photovoltaic performance. *Advanced Materials Interfaces*, 2019, 6(3), 1801480.
- [16] Zhao, C., Zhang, Z., Han, F., Xia, D., Xiao, C., Fang, J., & Li, W. An Organic-Inorganic Hybrid Electrolyte as a Cathode Interlayer for Efficient Organic Solar Cells. *Angewandte Chemie*, 2021, 133(15), 8607-8612.
- [17] Cheng, J., Xie, F., Liu, Y., Wei, E. I., Li, X., Yang, Y., & Choy, W. C. Efficient hole transport layers with widely tunable work function for deep HOMO level organic solar cells. *Journal of Materials Chemistry A*, 2015, 3(47), 23955-23963.
- [18] Borse, K., Sharma, R., Gupta, D., & Yella, A. Interface engineering through electron transport layer modification for high efficiency organic solar cells. *RSC advances*, 2018, 8(11), 5984-5991.
- [19] Pan, F., Sun, C., Li, Y., Tang, D., Zou, Y., Li, X., & Li, Y. Solution-processable n-doped graphene-containing cathode interfacial materials for high-performance organic solar cells. *Energy & Environmental Science*, 2019, 12(11), 3400-3411.
- [20] Jiang, Y., Sun, L., Jiang, F., Xie, C., Hu, L., Dong, X., & Zhou, Y. Photocatalytic effect of ZnO on the stability of nonfullerene acceptors and its mitigation by SnO<sub>2</sub> for nonfullerene organic solar cells. *Materials Horizons*, 2019, 6(7), 1438-1443.
- [21] Yu, Z., Feng, W., Lu, W., Li, B., Yao, H., Zeng, K., & Ouyang, J. MXenes with tunable work functions and their application as electron-and hole-transport materials in non-fullerene organic solar cells. *Journal of Materials Chemistry A*, 2019, 7(18), 11160-11169.
- [22] Cheng, M., Xu, B., Chen, C., Yang, X., Zhang, F., Tan, Q., & Sun, L. Phenoxazine-based small molecule material for efficient perovskite solar cells and bulk heterojunction organic solar cells. *Advanced Energy Materials*, 2015, 5(8), 1401720.
- [23] Wan, J., Fan, X., Huang, H., Wang, J., Zhang, Z., Fang, J., & Yan, F. Metal oxide-free flexible organic solar cells with 0.1 M perchloric acid sprayed polymeric anodes. *Journal of Materials Chemistry A*, 2020, 8(40), 21007-21015.
- [24] Hsieh, Y. T., Chen, J. Y., Fukuta, S., Lin, P. C., Higashihara, T., Chueh, C. C., & Chen, W. C. Realization of intrinsically stretchable organic solar cells enabled by charge-extraction layer and photoactive material engineering. *ACS applied materials & interfaces*, 2018, 10(25), 21712-21720.
- [25] Li, J., Wang, N., Wang, Y., Liang, Z., Peng, Y., Yang, C., & Xia, Y. Efficient inverted organic solar cells with a thin natural biomaterial L-Arginine as electron transport layer. *Solar Energy*, 2020, 196, 168-176.
- [26] Chen, Y., Yue, Y. Y., Wang, S. R., Zhang, N., Feng, J., & Sun, H. B. Thermally-induced wrinkles on PH1000/graphene composite electrode for enhanced efficiency of organic solar cells. *Solar Energy Materials and Solar Cells*, 2019, 201, 110075.
- [27] Jeon, I., Cui, K., Chiba, T., Anisimov, A., Nasibulin, A. G., Kauppinen, E. I., & Matsuo, Y. Direct and dry deposited single-walled carbon nanotube films doped with MoO<sub>x</sub> as electron-blocking transparent electrodes for flexible organic solar cells. *Journal of the American Chemical Society*, 2015, 137(25), 7982-7985.
- [28] Kang, Q., Zheng, Z., Zu, Y., Liao, Q., Bi, P., Zhang, S., & Hou, J. n-doped inorganic molecular

- clusters as a new type of hole transport material for efficient organic solar cells. *Joule*, 2021, 5(3), 646-658.
- [29] Kim, H. J., Seo, K. W., Noh, Y. J., Na, S. I., Sohn, A., Kim, D. W., & Kim, H. K. Work function and interface control of amorphous IZO electrodes by MoO<sub>3</sub> layer grading for organic solar cells. *Solar Energy Materials and Solar Cells*, 2015, 141, 194-202.
- [30] Lee, B. H., Lee, J. H., Jeong, S. Y., Park, S. B., Lee, S. H., & Lee, K. Broad Work-Function Tunability of p-Type Conjugated Polyelectrolytes for Efficient Organic Solar Cells. *Advanced Energy Materials*, 2015, 5(5), 1401653.
- [31] Liao, S. H., Jhuo, H. J., Cheng, Y. S., & Chen, S. A. Fullerene derivative-doped zinc oxide nanofilm as the cathode of inverted polymer solar cells with low-bandgap polymer (PTB7-Th) for high performance. *Advanced materials*, 2013, 25(34), 4766-4771.
- [32] Lin, Y., Adilbekova, B., Firdaus, Y., Yengel, E., Faber, H., Sajjad, M., & Anthopoulos, T. D. 17% efficient organic solar cells based on liquid exfoliated WS<sub>2</sub> as a replacement for PEDOT: PSS. *Advanced materials*, 2019, 31(46), 1902965.
- [33] Lin, Y., Firdaus, Y., Isikgor, F. H., Nugraha, M. I., Yengel, E., Harrison, G. T., & Anthopoulos, T. D. Self-assembled monolayer enables hole transport layer-free organic solar cells with 18% efficiency and improved operational stability. *ACS Energy Letters*, 2020, 5(9), 2935-2944.
- [34] Ma, R., Zeng, M., Li, Y., Liu, T., Luo, Z., Xu, Y., & Yan, H. Rational anode engineering enables progresses for different types of organic solar cells. *Advanced Energy Materials*, 2021, 11(23), 2100492.
- [35] Sun, C., Wu, Z., Hu, Z., Xiao, J., Zhao, W., Li, H. W., & Cao, Y. Interface design for high-efficiency non-fullerene polymer solar cells. *Energy & Environmental Science*, 2017, 10(8), 1784-1791.
- [36] Xing, W., Chen, Y., Wang, X., Lv, L., Ouyang, X., Ge, Z., & Huang, H. MoS<sub>2</sub> quantum dots with a tunable work function for high-performance organic solar cells. *ACS Applied Materials & Interfaces*, 2016, 8(40), 26916-26923.
- [37] Zhang, K., Xu, R., Ge, W., Qi, M., Zhang, G., Xu, Q. H., & Wang, X. Electrostatically self-assembled chitosan derivatives working as efficient cathode interlayers for organic solar cells. *Nano Energy*, 2017, 34, 164-171.
- [38] Ding, Z., Hao, Z., Meng, B., Xie, Z., Liu, J., & Dai, L. Few-layered graphene quantum dots as efficient hole-extraction layer for high-performance polymer solar cells. *Nano Energy*, 2015, 15, 186-192.
- [39] Konios, D., Kakavelakis, G., Petridis, C., Savva, K., Stratakis, E., & Kymakis, E. Highly efficient organic photovoltaic devices utilizing work-function tuned graphene oxide derivatives as the anode and cathode charge extraction layers. *Journal of Materials Chemistry A*, 2016, 4(5), 1612-1623.
- [40] Lin, X., Yang, Y., Nian, L., Su, H., Ou, J., Yuan, Z., & Chen, X. Interfacial modification layers based on carbon dots for efficient inverted polymer solar cells exceeding 10% power conversion efficiency. *Nano Energy*, 2016, 26, 216-223.
- [41] Liu, H., Hu, L., Wu, F., Chen, L., & Chen, Y. Polyfluorene electrolytes interfacial layer for efficient polymer solar cells: controllably interfacial dipoles by regulation of polar groups. *ACS applied materials & interfaces*, 2016, 8(15), 9821-9828.
- [42] Wang, J., Zheng, Z., Zhang, D., Zhang, J., Zhou, J., Liu, J., & Zhou, H. Regulating

bulk-heterojunction molecular orientations through surface free energy control of hole-transporting layers for high-performance organic solar cells. *Advanced Materials*, 2019, 31(17), 1806921.

- [43] Xu, B., Gopalan, S. A., Gopalan, A. I., Muthuchamy, N., Lee, K. P., Lee, J. S., & Kang, S. W. Functional solid additive modified PEDOT:PSS as an anode buffer layer for enhanced photovoltaic performance and stability in polymer solar cells. *Scientific Reports*, 2017, 7(1), 1-13.
- [44] Zheng, Z., Hu, Q., Zhang, S., Zhang, D., Wang, J., Xie, S., & Zhou, H. A highly efficient non-fullerene organic solar cell with a fill factor over 0.80 enabled by a fine-tuned hole-transporting layer. *Advanced materials*, 2018, 30(34), 1801801.
- [45] Zhang, L., Ding, Z. C., Tong, T., & Liu, J. Tuning the work functions of graphene quantum dot-modified electrodes for polymer solar cell applications. *Nanoscale*, 2017, 9(10), 3524-3529.
- [46] Tran, H. N., Park, S., Wibowo, F. T. A., Krishna, N. V., Kang, J. H., Seo, J. H., & Cho, S. 17% Non-Fullerene Organic Solar Cells with Annealing-Free Aqueous MoO<sub>x</sub>. *Advanced Science*, 2020, 7(21), 2002395.
- [47] Zhang, D., Wang, J., Zhang, X., Zhou, J., Zafar, S. U., Zhou, H., & Zhang, Y. Sequential molecular doping of non-fullerene organic solar cells without hole transport layers. *Journal of Materials Chemistry C*, 2020, 8(1), 158-164.
- [48] Babu, B. H., Lyu, C., Zhang, H., Chen, Z., Li, F., Feng, L., & Hao, X. T. Modification of Hole Transport Layers for Fabricating High Performance Non-fullerene Polymer Solar Cells. *Chinese Journal of Chemistry*, 2020, 38(8), 817-822.
- [49] Hou, C., & Yu, H. Modifying the nanostructures of PEDOT:PSS/Ti<sub>3</sub>C<sub>2</sub>TX composite hole transport layers for highly efficient polymer solar cells. *Journal of Materials Chemistry C*, 2020, 8(12), 4169-4180.
- [50] Hilal, M., & Han, J. I. Significant improvement in the photovoltaic stability of bulk heterojunction organic solar cells by the molecular level interaction of graphene oxide with a PEDOT:PSS composite hole transport layer. *Solar Energy*, 2018, 167, 24-34.
- [51] Li, W., Cai, J., Yan, Y., Cai, F., Li, S., Gurney, R. S., & Wang, T. Correlating Three-dimensional Morphology With Function in PBDB-T: IT-M Non-Fullerene Organic Solar Cells. *Solar RRL*, 2018, 2(9), 1800114.
- [52] Nicasio-Collazo, J., Maldonado, J. L., Salinas-Cruz, J., Barreiro-Argüelles, D., Caballero-Quintana, I., Vazquez-Espinosa, C., & Romero-Borja, D. Functionalized and reduced graphene oxide as hole transport layer and for use in ternary organic solar cell. *Optical Materials*, 2019, 98, 109434.
- [53] Zheng, X., Zhang, H., Yang, Q., Xiong, C., Li, W., Yan, Y., & Wang, T. Solution-processed Graphene-MoS<sub>2</sub> heterostructure for efficient hole extraction in organic solar cells. *Carbon*, 2019, 142, 156-163.
- [54] Tang, H., Liu, Z., Hu, Z., Liang, Y., Huang, F., & Cao, Y. Oxoammonium enabled secondary doping of hole transporting material PEDOT:PSS for high-performance organic solar cells. *Science China Chemistry*, 2020, 63(6), 802-809.
- [55] Kang, Q., Zu, Y., Liao, Q., Zheng, Z., Yao, H., Zhang, S., & Hou, J. An inorganic molecule-induced electron transfer complex for highly efficient organic solar cells. *Journal of Materials Chemistry A*, 2020, 8(11), 5580-5586.



- [56] Soutlati, A., Verykios, A., Panagiotakis, S., Armadorou, K. K., Haider, M. I., Kaltzoglou, A., & Vasilopoulou, M. Suppressing the photocatalytic activity of zinc oxide electron-transport layer in nonfullerene organic solar cells with a pyrene-bodipy interlayer. *ACS applied materials & interfaces*, 2020, 12(19), 21961-21973.
- [57] Huai, Z., Wang, L., Sun, Y., Fan, R., Huang, S., Zhao, X., & Yang, S. High-efficiency and stable organic solar cells enabled by dual cathode buffer layers. *ACS applied materials & interfaces*, 2018, 10(6), 5682-5692.
- [58] Chen, S., Wang, Y., Zhang, L., Zhao, J., Chen, Y., Zhu, D., & Yan, H. Efficient nonfullerene organic solar cells with small driving forces for both hole and electron transfer. *Advanced Materials*, 2018, 30(45), 1804215.
- [59] Yin, Z., Zheng, Q., Chen, S. C., Cai, D., & Ma, Y. Controllable ZnMgO Electron-Transporting Layers for Long-Term Stable Organic Solar Cells with 8.06% Efficiency after One-Year Storage. *Advanced Energy Materials*, 2016, 6(4), 1501493.
- [60] Wang, Z., Zheng, N., Zhang, W., Yan, H., Xie, Z., Ma, Y., & Cao, Y. Self-Doped, n-Type Perylene Diimide Derivatives as Electron Transporting Layers for High-Efficiency Polymer Solar Cells. *Advanced Energy Materials*, 2017, 7(15), 1700232.
- [61] Lee, E. J., Heo, S. W., Han, Y. W., & Moon, D. K. An organic-inorganic hybrid interlayer for improved electron extraction in inverted polymer solar cells. *Journal of Materials Chemistry C*, 2016, 4(13), 2463-2469.
- [62] Zhu, L., Lu, Q., Lv, L., Wang, Y., Hu, Y., Deng, Z., & Teng, F. Ligand-free rutile and anatase TiO<sub>2</sub> nanocrystals as electron extraction layers for high performance inverted polymer solar cells. *RSC advances*, 2017, 7(33), 20084-20092.
- [63] Borse, K., Sharma, R., Gupta, D., & Yella, A. Interface engineering through electron transport layer modification for high efficiency organic solar cells. *RSC advances*, 2018, 8(11), 5984-5991.
- [64] Zheng, Z., Zhang, S., Wang, J., Zhang, J., Zhang, D., Zhang, Y., & Zhou, H. Exquisite modulation of ZnO nanoparticle electron transporting layer for high-performance fullerene-free organic solar cell with inverted structure. *Journal of Materials Chemistry A*, 2019, 7(8), 3570-3576.
- [65] Ling, Z., Zhao, Y., Wang, S., Pan, S., Lian, H., Peng, C., & Chen, G. High-performance light-soaking-free polymer solar cells based on a LiF modified ZnO electron extraction layer. *Journal of Materials Chemistry C*, 2019, 7(30), 9354-9361.
- [66] Wang, Y., Liang, Z., Li, X., Qin, J., Ren, M., Yang, C., & Li, J. Self-doping n-type polymer as a cathode interface layer enables efficient organic solar cells by increasing built-in electric field and boosting interface contact. *Journal of Materials Chemistry C*, 2019, 7(36), 11152-11159.
- [67] Tran, V. H., Eom, S. H., Yoon, S. C., Kim, S. K., & Lee, S. H. Enhancing device performance of inverted organic solar cells with SnO<sub>2</sub>/Cs<sub>2</sub>CO<sub>3</sub> as dual electron transport layers. *Organic Electronics*, 2019, 68, 85-95.
- [68] Wei, J., Zhang, C., Ji, G., Han, Y., Ismail, I., Li, H., & Ma, C. Q. Roll-to-roll printed stable and thickness-independent ZnO:PEI composite electron transport layer for inverted organic solar cells. *Solar Energy*, 2019, 193, 102-110.
- [69] Upama, M. B., Elumalai, N. K., Mahmud, M. A., Xu, C., Wang, D., Wright, M., & Uddin, A. Enhanced electron transport enables over 12% efficiency by interface engineering of non-

- fullerene organic solar cells. *Solar Energy Materials and Solar Cells*, 2018, 187, 273-282.
- [70] Tountas, M., Topal, Y., Polydorou, E., Soultati, A., Verykios, A., Kaltzoglou, A., & Vasilopoulou, M. Low work function lacunary polyoxometalates as electron transport interlayers for inverted polymer solar cells of improved efficiency and stability. *ACS Applied Materials & Interfaces*, 2017, 9(27), 22773-22787.
- [71] Hu, H. C., Xu, H., Wu, J., Li, L., Yue, F., Huang, L., & Ouyang, X. Secondary Bonds Modifying Conjugate-Blocked Linkages of Biomass-Derived Lignin to Form Electron Transfer 3D Networks for Efficiency Exceeding 16% Nonfullerene Organic Solar Cells. *Advanced Functional Materials*, 2020, 30(23), 2001494.
- [72] Yao, J., Qiu, B., Zhang, Z. G., Xue, L., Wang, R., Zhang, C., & Li, Y. Cathode engineering with perylene-diimide interlayer enabling over 17% efficiency single-junction organic solar cells. *Nature communications*, 2020, 11(1), 1-10.
- [73] Kadam, K. D., Kim, H., Rehman, S., Patil, H., Aziz, J., Dongale, T. D., & Kim, D. K. Optimization of ZnO:PEIE as an electron transport layer for flexible organic solar cells. *Energy & Fuels*, 2021, 35(15), 12416-12424.
- [74] Yan, Y., Cai, F., Yang, L., Li, J., Zhang, Y., Qin, F., & Wang, T. Light-Soaking-Free Inverted Polymer Solar Cells with an Efficiency of 10.5% by Compositional and Surface Modifications to a Low-Temperature-Processed TiO<sub>2</sub> Electron-Transport Layer. *Advanced Materials*, 2017, 29(1), 1604044.
- [75] Huang, X., Yu, H., Shi, S., & Huang, C. Improving the performance of inverted polymer solar cells by the efficiently doping and modification of electron transport layer-ZnO. *Organic Electronics*, 2019, 65, 311-320.
- [76] Qiu, B., Chen, S., Li, H., Luo, Z., Yao, J., Sun, C., & Li, Y. A simple approach to prepare chlorinated polymer donors with low-lying HOMO level for high performance polymer solar cells. *Chemistry of Materials*, 2019, 31(17), 6558-6567.
- [77] Zhao, F., Deng, L., Wang, K., Han, C., Liu, Z., Yu, H., & Hu, B. Surface modification of SnO<sub>2</sub> via MAPbI<sub>3</sub> nanowires for a highly efficient non-fullerene acceptor-based organic solar cell. *ACS applied materials & interfaces*, 2020, 12(4), 5120-5127.
- [78] Lei, T., Peng, R., Huang, L., Song, W., Yan, T., Zhu, L., & Ge, Z. 13.5% flexible organic solar cells achieved by robust composite ITO/PEDOT:PSS electrodes. *Materials Today Energy*, 2019, 14, 100334.
- [79] Wang, Y., Li, N., Cui, M., Li, Y., Tian, X., Xu, X., & Nian, L. High-performance hole transport layer based on WS<sub>2</sub> doped PEDOT:PSS for organic solar cells. *Organic Electronics*, 2021, 99, 106305.
- [80] Zhang, X., Zhang, B., Ouyang, X., Chen, L., & Wu, H. Polymer solar cells employing water-soluble polypyrrole nanoparticles as dopants of PEDOT:PSS with enhanced efficiency and stability. *The Journal of Physical Chemistry C*, 2017, 121(34), 18378-18384.
- [81] Wang, J., Yu, H., Hou, C., & Zhang, J. Solution-processable PEDOT:PSS:  $\alpha$ -In<sub>2</sub>Se<sub>3</sub> with enhanced conductivity as a hole transport layer for high-performance polymer solar cells. *ACS applied materials & interfaces*, 2020, 12(23), 26543-26554.
- [82] Xu, R., Zhang, K., Liu, X., Jin, Y., Jiang, X. F., Xu, Q. H., & Cao, Y. Alkali salt-doped highly transparent and thickness-insensitive electron-transport layer for high-performance polymer solar cell. *ACS applied materials & interfaces*, 2018, 10(2), 1939-1947.

- [83] Gupta, M., Yan, D., Xu, J., Yao, J., & Zhan, C. Tetraphenylphosphonium bromide as a cathode buffer layer material for highly efficient polymer solar cells. *ACS applied materials & interfaces*, 2018, 10(6), 5569-5576.
- [84] Zhang, J., Xue, R., Xu, G., Chen, W., Bian, G. Q., Wei, C., & Li, Y. Self-Doping Fullerene Electrolyte-Based Electron Transport Layer for All-Room-Temperature-Processed High-Performance Flexible Polymer Solar Cells. *Advanced Functional Materials*, 2018, 28(13), 1705847.
- [85] Huang, J., Yu, H., & Zhou, X. ZnO nanoparticles modified with biomaterial GHK-Cu as electron transport layer to fabricate highly efficient inverted polymer solar cells. *Chemical Engineering Journal*, 2022, 428, 131366.
- [86] Cheng, J., Zhang, H., Zhao, Y., Mao, J., Li, C., Zhang, S., & Choy, W. C. Self-Assembled Quasi-3D Nanocomposite: A Novel p-Type Hole Transport Layer for High Performance Inverted Organic Solar Cells. *Advanced Functional Materials*, 2018, 28(15), 1706403.
- [87] Gao, X., Su, Z., Qu, S., Zhang, W., Gao, Y., He, S., & Wang, Z. Efficient and moisture-resistant organic solar cells via simultaneously reducing the surface defects and hydrophilicity of an electron transport layer. *Journal of Materials Chemistry C*, 2021, 9(38), 13500-13508.
- [88] Liu, L., Li, F., Zhao, C., Bi, F., Jiu, T., Zhao, M., & Xiao, X. Performance enhancement of conventional polymer solar cells with TTF-py-modified PEDOT:PSS film as the hole transport layer. *ACS Applied Energy Materials*, 2019, 2(9), 6577-6583.
- [89] Wang, Y., Li, J., Li, T., Wang, J., Liu, K., Jiang, Q., & Zhan, X. Black phosphorous quantum dots sandwiched organic solar cells. *Small*, 2019, 15(47), 1903977.
- [90] Liu, L., Zhou, S., Zhao, C., Jiu, T., Bi, F., Jian, H., & Xiao, X. TTA as a potential hole transport layer for application in conventional polymer solar cells. *Journal of Energy Chemistry*, 2020, 42, 210-216.
- [91] Zhao, W., Yan, L., Gu, H., Li, Z., Wang, Y., Luo, Q., & Ma, C. Q. Zinc oxide coated carbon dot nanoparticles as electron transport layer for inverted polymer solar cells. *ACS Applied Energy Materials*, 2020, 3(11), 11388-11397.
- [92] Liu, H., Ma, Z., Yu, R., Gao, H., Lin, J., Hayat, T., & Tan, Z. A. Crosslinkable metal chelate as the electron transport layer for efficient and stable inverted polymer solar cells. *Materials Chemistry Frontiers*, 2020, 4(10), 2995-3002.
- [93] Aatif, M., & Tiwari, J. P. Futuristic electron transport layer based on multifunctional interactions of ZnO/TCNE for stable inverted organic solar cells. *RSC advances*, 2020, 10(69), 42305-42317.
- [94] Hou, C., Yu, H., & Huang, C. Solution-processable Ti<sub>3</sub>C<sub>2</sub>T<sub>x</sub> nanosheets as an efficient hole transport layer for high-performance and stable polymer solar cells. *Journal of Materials Chemistry C*, 2019, 7(37), 11549-11558.
- [95] Hong, J., Zhang, D., Kwon, H. J., Park, C. E., Kwon, S. K., & Kim, Y. H. A Solution-Processed Cathode Interfacial Layer Facilitates Efficient Energy Level Alignment in Organic Photovoltaics. *The Journal of Physical Chemistry C*, 2021, 125(36), 20067-20075.
- [96] Li, Y., Han, M., Yang, W., Guo, J., Chang, K., Wang, J., & Li, Z. Perylene diimide-based cathode interfacial materials: adjustable molecular structures and conformation, optimized film morphology, and much improved performance of non-fullerene polymer solar cells. *Materials Chemistry Frontiers*, 2019, 3(9), 1840-1848.
- [97] Lin, L., Huang, Z., Luo, Y., Peng, T., He, B., Chen, G., & Yang, W. Alcohol-soluble fluorene

- derivate functionalized with pyridyl groups as a high-performance cathode interfacial material in organic solar cells. *New Journal of Chemistry*, 2021, 45(10), 4584-4591.
- [98] Chen, G., Qian, G., Yi, S., He, Z., Wu, H. B., Yang, W., & Cao, Y. Molecular Engineering on Bis (benzothiophene-S, S-dioxide)-Based Large-Band Gap Polymers for Interfacial Modifications in Polymer Solar Cells. *ACS applied materials & interfaces*, 2019, 11(49), 45969-45978.
- [99] Prasetio, A., Jahandar, M., Kim, S., Heo, J., Kim, Y. H., & Lim, D. C. Mitigating the Undesirable Chemical Reaction between Organic Molecules for Highly Efficient Flexible Organic Photovoltaics. *Advanced Science*, 2021, 8(14), 2100865.
- [100] Kim, S., Prasetio, A., Han, J. W., Kim, Y., Shin, M., Heo, J., & Lim, D. C. Enhanced flexible optoelectronic devices by controlling the wettability of an organic bifacial interlayer. *Communications Materials*, 2021, 2(1), 1-10.
- [101] Li, J., Qin, F., Zeng, W., Sun, L., Wang, W., & Zhou, Y. N-doping of fullerene using 1,3,5-trimethylhexahydro-1,3,5-triazine as an electron transport layer for nonfullerene organic solar cells. *Sustainable Energy & Fuels*, 2020, 4(4), 1984-1990.
- [102] Wang, Z., Dong, J., Guo, J., Wang, Z., Yan, L., Hao, Y., & Yin, S. Hybrid Hole Extraction Layer Enabled High Efficiency in Polymer Solar Cells. *ACS Applied Materials & Interfaces*, 2020, 12(49), 55342-55348.
- [103] Lu, L., Kang, Q., Yang, C., Xu, B., & Hou, J. Conjugated polymers containing sulfonic acid fluorene unit for achieving multiple interfacial modifications in fullerene-free organic solar cells. *The Journal of Physical Chemistry C*, 2018, 122(34), 19328-19337.
- [104] Soutati, A., Fakharuddin, A., Polydorou, E., Drivas, C., Kaltzoglou, A., Haider, M. I., & Vasilopoulou, M. Lithium doping of ZnO for high efficiency and stability fullerene and non-fullerene organic solar cells. *ACS Applied Energy Materials*, 2019, 2(3), 1663-1675.
- [105] Chen, H., Liu, L., Zhao, M., Zhang, G. H., Zhao, C., Jiu, T., & Tao, G. H. Interfacial Carrier-Transfer Channel Optimization Based on Hydrogen Bonds for High-Performance Organic Solar Cells. *ACS Applied Energy Materials*, 2021, 4(4), 3881-3890.
- [106] Gao, J., Ge, J., Peng, R., Liu, C., Cao, L., Zhang, D., & Ge, Z. Over 14% efficiency nonfullerene all-small-molecule organic solar cells enabled by improving the ordering of molecular donors via side-chain engineering. *Journal of materials chemistry A*, 2020, 8(15), 7405-7411.
- [107] Yu, Y., Tan, X., Ning, S., & Wu, Y. Machine learning for understanding compatibility of organic-inorganic hybrid perovskites with post-treatment amines. *ACS Energy Letters*, 2019, 4(2), 397-404.
- [108] Bhavani, T. T., Rao, M. K., & Reddy, A. M. Network intrusion detection system using random forest and decision tree machine learning techniques. *First international conference on sustainable technologies for computational intelligence*. Springer, Singapore, 2020, (pp. 637-643).
- [109] Lee, M. H. Machine Learning for Understanding the Relationship between the Charge Transport Mobility and Electronic Energy Levels for n-Type Organic Field-Effect Transistors. *Advanced Electronic Materials*, 2019, 5(12), 1900573.
- [110] Chen, T., & Guestrin, C. Xgboost: A scalable tree boosting system. In *Proceedings of the 22nd acm sigkdd international conference on knowledge discovery and data mining*. 2016, (pp. 785-794).

- [111] Hao, T., Leng, S., Yang, Y., Zhong, W., Zhang, M., Zhu, L., ... & Liu, F. Capture the high-efficiency non-fullerene ternary organic solar cells formula by machine-learning-assisted energy-level alignment optimization. *Patterns*, 2021, 2(9), 100333.
- [112] Cai, Y., Chang, L., You, L., Fan, B., Liu, H., & Sun, Y. Novel nonconjugated polymer as cathode buffer layer for efficient organic solar cells. *ACS applied materials & interfaces*, 2018, 10(28), 24082-24089.
- [113] Singh, R., Suranagi, S. R., Lee, J., Lee, H., Kim, M., & Cho, K. Unraveling the efficiency-limiting morphological issues of the perylene diimide-based non-fullerene organic solar cells. *Scientific Reports*, 2018, 8(1), 1-9.
- [114] Wang, Z., Dong, J., Guo, J., Wang, Z., Yan, L., Hao, Y., ... & Yin, S. Hybrid Hole Extraction Layer Enabled High Efficiency in Polymer Solar Cells. *ACS Applied Materials & Interfaces*, 2020, 12(49), 55342-55348.
- [115] Sharma, G. D., Bucher, L., Desbois, N., Gros, C. P., Gupta, G., & Malhotra, P. Polymer solar cell based on ternary active layer consists of medium bandgap polymer and two non-fullerene acceptors. *Solar Energy*, 2020, 207, 1427-1433.
- [116] Gao, J., Ge, J., Peng, R., Liu, C., Cao, L., Zhang, D., ... & Ge, Z. Over 14% efficiency nonfullerene all-small-molecule organic solar cells enabled by improving the ordering of molecular donors via side-chain engineering. *Journal of materials chemistry A*, 2020, 8(15), 7405-7411.
- [117] Wang, S., Li, Z., Xu, X., Zhang, G., Li, Y., & Peng, Q. Amino-functionalized graphene quantum dots as cathode interlayer for efficient organic solar cells: quantum dot size on interfacial modification ability and photovoltaic performance. *Advanced Materials Interfaces*, 2019, 6(3), 1801480.
- [118] Wang, J., Tong, Y., Zhang, X., Li, Z., Hao, Y., & Wang, H. PTB7: PC71BM bulk heterojunction solar cells exhibiting 9.64% efficiency via adopting moderate polarity solvent vapor annealing treatment. *Molecular Crystals and Liquid Crystals*, 2022, 740(1), 127-137.
- [119] Kim, W., Choi, J., Kim, J. H., Kim, T., Lee, C., Lee, S., ... & Kim, T. S. Comparative Study of the mechanical properties of all-polymer and fullerene-polymer solar cells: the importance of polymer acceptors for high fracture resistance. *Chemistry of Materials*, 2018, 30(6), 2102-2111.
- [120] Song, L., Wang, W., Barabino, E., Yang, D., Körstgens, V., Zhang, P., ... & Müller-Buschbaum, P. Composition-morphology correlation in PTB7-Th/PC71BM blend films for organic solar cells. *ACS applied materials & interfaces*, 2018, 11(3), 3125-3135.
- [121] Lu, W., Peng, Y., Chen, Q., Tang, W., Pang, T., Zhang, S., ... & Wang, X. Hole transport layer free bulk heterojunction organic solar cells with high work function ITO anodes. *AIP Advances*, 2018, 8(9), 095027.
- [122] Zhao, J., Zhao, S., Xu, Z., Qiao, B., Huang, D., Zhao, L., ... & Wang, P. Revealing the effect of additives with different solubility on the morphology and the donor crystalline structures of organic solar cells. *ACS Applied Materials & Interfaces*, 2016, 8(28), 18231-18237.
- [123] Zheng, Y., Wang, G., Huang, D., Kong, J., Goh, T., Huang, W., ... & Taylor, A. D. Binary solvent additives treatment boosts the efficiency of PTB7: PCBM polymer solar cells to over 9.5%. *Solar Rrl*, 2018, 2(4), 1700144.
- [124] Sharma, R., Gupta, V., Lee, H., Borse, K., Datt, R., Sharma, C., ... & Gupta, D. Charge carrier dynamics in PffBT4T-2OD: PCBM organic solar cells. *Organic Electronics*, 2018, 62, 441-447.

- [125] Kim, G. U., Lee, Y. W., Ma, B. S., Kim, J., Park, J. S., Lee, S., ... & Kim, B. J. Triad-type, multi-functional compatibilizers for enhancing efficiency, stability and mechanical robustness of polymer solar cells. *Journal of Materials Chemistry A*, 2020, 8(27), 13522-13531.
- [126] Jain, N., Sharma, R., Mahesh, S., Moghe, D., Snaith, H. J., Yoo, S., & Kabra, D. Role of Electronic States and Their Coupling on Radiative Losses of Open-Circuit Voltage in Organic Photovoltaics. *ACS Applied Materials & Interfaces*, 2021, 13(50), 60279-60287.
- [127] Wang, X., Zhai, X., Jing, X., Gao, C., He, Y., Yu, L., & Sun, M. Incorporation of a classical visible non-fullerene acceptor into host binary blend enable ternary high-performance semitransparent polymer solar cells. *Chemical Engineering Journal*, 2022, 427, 132048.
- [128] Gao, J., Ma, X., Xu, C., Wang, X., Son, J. H., Jeong, S. Y., ... & Zhang, F. Over 17.7% efficiency ternary-blend organic solar cells with low energy-loss and good thickness-tolerance. *Chemical Engineering Journal*, 2022, 428, 129276.
- [129] Fan, H., Yang, H., Wu, Y., Yildiz, O., Zhu, X., Marszalek, T., ... & Li, Y. Anthracene-Assisted Morphology Optimization in Photoactive Layer for High-Efficiency Polymer Solar Cells. *Advanced Functional Materials*, 2021, 31(37), 2103944.
- [130] Yuan, J., Zhang, Y., Zhou, L., Zhang, G., Yip, H. L., Lau, T. K., ... & Zou, Y. Single-junction organic solar cell with over 15% efficiency using fused-ring acceptor with electron-deficient core. *Joule*, 2019, 3(4), 1140-1151.
- [131] Deng, J., Huang, B., Li, W., Zhang, L., Jeong, S. Y., Huang, S., ... & Chen, L. Ferroelectric Polymer Drives Performance Enhancement of Non-fullerene Organic Solar Cells. *Angewandte Chemie International Edition*, 2022, 61(25), e202202177.
